# Supplementary material for: Automation of gene assignments to metabolic pathways using high-throughput expression data
Source: Springer Nature journal article supplement (doi:10.1186/1471-2105-6-217), 2005-08-31
Supplement: 12859_2005_542_MOESM2_ESM.pdf [file 12859_2005_542_MOESM2_ESM.pdf]

| Number | Normalized Score | Number of Pairs | Positive Pairs | Negative Pairs | Zero Pairs | Assignments                                                                                                                                                                                                                                                                                                                                                                                                                               |
|--------|------------------|-----------------|----------------|----------------|------------|-------------------------------------------------------------------------------------------------------------------------------------------------------------------------------------------------------------------------------------------------------------------------------------------------------------------------------------------------------------------------------------------------------------------------------------------|
| 1      | 9.51             | 153             | 144            | 9              | 37         | 6.1.1.14 : YBR121C<br>6.1.1.21 : YPR033C<br>6.1.1.6 : YDR037W<br>6.1.1.10 : YGR264C<br>6.1.1.20 : 1887<br>6.1.1.15 : YHR020W<br>6.1.1.11 : YDR023W<br>6.1.1.3 : 2924<br>6.1.1.2 : YOL097C<br>6.1.1.1 : YGR185C<br>6.1.1.12 : YLL018C<br>6.1.1.22 : YHR019C<br>6.1.1.7 : YOR335C<br>6.1.1.9 : YGR094W<br>6.1.1.4 : YPL160W<br>6.1.1.5 : YBL076C<br>6.1.1.17 : YGL245W<br>6.1.1.18 : YOR168W<br>6.1.1.16 : YNL247W<br>6.1.1.19 : YDR341C    |
| 2      | 9.44             | 171             | 162            | 9              | 19         | 6.1.1.14 : YBR121C<br>6.1.1.21 : YPR033C<br>6.1.1.6 : YDR037W<br>6.1.1.10 : YGR264C<br>6.1.1.20 : YLR060W<br>6.1.1.15 : YHR020W<br>6.1.1.11 : YDR023W<br>6.1.1.3 : 2924<br>6.1.1.2 : YOL097C<br>6.1.1.1 : YGR185C<br>6.1.1.12 : YLL018C<br>6.1.1.22 : YHR019C<br>6.1.1.7 : YOR335C<br>6.1.1.9 : YGR094W<br>6.1.1.4 : YPL160W<br>6.1.1.5 : YBL076C<br>6.1.1.17 : YGL245W<br>6.1.1.18 : YOR168W<br>6.1.1.16 : YNL247W<br>6.1.1.19 : YDR341C |

Assignments for the pathway "tRNA charging pathway" (rosetta data set). There are 49152 possible assignments of genes to reactions(only the 10 highest scoring and the 10 lowest scoring assignments are displayed).

| Number | Normalized Score | Number of Pairs | Positive Pairs | Negative Pairs | Zero Pairs | Assignments                                                                                                                                                                                                                                                                                                                                                                                                                               |
|--------|------------------|-----------------|----------------|----------------|------------|-------------------------------------------------------------------------------------------------------------------------------------------------------------------------------------------------------------------------------------------------------------------------------------------------------------------------------------------------------------------------------------------------------------------------------------------|
| 3      | 8.57             | 153             | 136            | 17             | 37         | 6.1.1.14 : YBR121C<br>6.1.1.21 : YPR033C<br>6.1.1.6 : YDR037W<br>6.1.1.10 : YGR264C<br>6.1.1.20 : 1887<br>6.1.1.15 : YHR020W<br>6.1.1.11 : YHR011W<br>6.1.1.3 : 2924<br>6.1.1.2 : YOL097C<br>6.1.1.1 : YGR185C<br>6.1.1.12 : YLL018C<br>6.1.1.22 : YHR019C<br>6.1.1.7 : YOR335C<br>6.1.1.9 : YGR094W<br>6.1.1.4 : YPL160W<br>6.1.1.5 : YBL076C<br>6.1.1.17 : YGL245W<br>6.1.1.18 : YOR168W<br>6.1.1.16 : YNL247W<br>6.1.1.19 : YDR341C    |
| 4      | 8.57             | 171             | 154            | 17             | 19         | 6.1.1.14 : YBR121C<br>6.1.1.21 : YPR033C<br>6.1.1.6 : YDR037W<br>6.1.1.10 : YGR264C<br>6.1.1.20 : YLR060W<br>6.1.1.15 : YHR020W<br>6.1.1.11 : YHR011W<br>6.1.1.3 : 2924<br>6.1.1.2 : YOL097C<br>6.1.1.1 : YGR185C<br>6.1.1.12 : YLL018C<br>6.1.1.22 : YHR019C<br>6.1.1.7 : YOR335C<br>6.1.1.9 : YGR094W<br>6.1.1.4 : YPL160W<br>6.1.1.5 : YBL076C<br>6.1.1.17 : YGL245W<br>6.1.1.18 : YOR168W<br>6.1.1.16 : YNL247W<br>6.1.1.19 : YDR341C |

Assignments for the pathway "tRNA charging pathway" (rosetta data set). There are 49152 possible assignments of genes to reactions(only the 10 highest scoring and the 10 lowest scoring assignments are displayed).

| Number | Normalized Score | Number of Pairs | Positive Pairs | Negative Pairs | Zero Pairs | Assignments                                                                                                                                                                                                                                                                                                                                                                                                                               |
|--------|------------------|-----------------|----------------|----------------|------------|-------------------------------------------------------------------------------------------------------------------------------------------------------------------------------------------------------------------------------------------------------------------------------------------------------------------------------------------------------------------------------------------------------------------------------------------|
| 5      | 8.42             | 171             | 150            | 21             | 19         | 6.1.1.14 : YPR081C<br>6.1.1.21 : YPR033C<br>6.1.1.6 : YDR037W<br>6.1.1.10 : YGR264C<br>6.1.1.20 : YLR060W<br>6.1.1.15 : YHR020W<br>6.1.1.11 : YDR023W<br>6.1.1.3 : 2924<br>6.1.1.2 : YOL097C<br>6.1.1.1 : YGR185C<br>6.1.1.12 : YLL018C<br>6.1.1.22 : YHR019C<br>6.1.1.7 : YOR335C<br>6.1.1.9 : YGR094W<br>6.1.1.4 : YPL160W<br>6.1.1.5 : YBL076C<br>6.1.1.17 : YGL245W<br>6.1.1.18 : YOR168W<br>6.1.1.16 : YNL247W<br>6.1.1.19 : YDR341C |
| 6      | 8.41             | 153             | 133            | 20             | 37         | 6.1.1.14 : YPR081C<br>6.1.1.21 : YPR033C<br>6.1.1.6 : YDR037W<br>6.1.1.10 : YGR264C<br>6.1.1.20 : 1887<br>6.1.1.15 : YHR020W<br>6.1.1.11 : YDR023W<br>6.1.1.3 : 2924<br>6.1.1.2 : YOL097C<br>6.1.1.1 : YGR185C<br>6.1.1.12 : YLL018C<br>6.1.1.22 : YHR019C<br>6.1.1.7 : YOR335C<br>6.1.1.9 : YGR094W<br>6.1.1.4 : YPL160W<br>6.1.1.5 : YBL076C<br>6.1.1.17 : YGL245W<br>6.1.1.18 : YOR168W<br>6.1.1.16 : YNL247W<br>6.1.1.19 : YDR341C    |

Assignments for the pathway "tRNA charging pathway" (rosetta data set). There are 49152 possible assignments of genes to reactions(only the 10 highest scoring and the 10 lowest scoring assignments are displayed).

| Number | Normalized Score | Number of Pairs | Positive Pairs | Negative Pairs | Zero Pairs | Assignments                                                                                                                                                                                                                                                                                                                                                                                                                               |
|--------|------------------|-----------------|----------------|----------------|------------|-------------------------------------------------------------------------------------------------------------------------------------------------------------------------------------------------------------------------------------------------------------------------------------------------------------------------------------------------------------------------------------------------------------------------------------------|
| 7      | 8.41             | 171             | 153            | 18             | 19         | 6.1.1.14 : YBR121C<br>6.1.1.21 : YPR033C<br>6.1.1.6 : YDR037W<br>6.1.1.10 : YGR264C<br>6.1.1.20 : YLR060W<br>6.1.1.15 : YHR020W<br>6.1.1.11 : YDR023W<br>6.1.1.3 : 2924<br>6.1.1.2 : YOL097C<br>6.1.1.1 : YGR185C<br>6.1.1.12 : YLL018C<br>6.1.1.22 : YHR019C<br>6.1.1.7 : YOR335C<br>6.1.1.9 : YGR094W<br>6.1.1.4 : YPL160W<br>6.1.1.5 : YBL076C<br>6.1.1.17 : YGL245W<br>6.1.1.18 : YOR168W<br>6.1.1.16 : YNL247W<br>6.1.1.19 : YHR091C |
| 8      | 8.39             | 171             | 150            | 21             | 19         | 6.1.1.14 : YBR121C<br>6.1.1.21 : YPR033C<br>6.1.1.6 : YDR037W<br>6.1.1.10 : YGR264C<br>6.1.1.20 : YLR060W<br>6.1.1.15 : YHR020W<br>6.1.1.11 : YDR023W<br>6.1.1.3 : 2924<br>6.1.1.2 : YOL097C<br>6.1.1.1 : YGR185C<br>6.1.1.12 : YLL018C<br>6.1.1.22 : YHR019C<br>6.1.1.7 : YOR335C<br>6.1.1.9 : YGR094W<br>6.1.1.4 : YPL160W<br>6.1.1.5 : YPL040C<br>6.1.1.17 : YGL245W<br>6.1.1.18 : YOR168W<br>6.1.1.16 : YNL247W<br>6.1.1.19 : YDR341C |

Assignments for the pathway "tRNA charging pathway" (rosetta data set). There are 49152 possible assignments of genes to reactions(only the 10 highest scoring and the 10 lowest scoring assignments are displayed).

| Number | Normalized Score | Number of Pairs | Positive Pairs | Negative Pairs | Zero Pairs | Assignments                                                                                                                                                                                                                                                                                                                                                                                                                            |
|--------|------------------|-----------------|----------------|----------------|------------|----------------------------------------------------------------------------------------------------------------------------------------------------------------------------------------------------------------------------------------------------------------------------------------------------------------------------------------------------------------------------------------------------------------------------------------|
| 9      | 8.36             | 153             | 132            | 21             | 37         | 6.1.1.14 : YBR121C<br>6.1.1.21 : YPR033C<br>6.1.1.6 : YDR037W<br>6.1.1.10 : YGR264C<br>6.1.1.20 : 1887<br>6.1.1.15 : YHR020W<br>6.1.1.11 : YDR023W<br>6.1.1.3 : 2924<br>6.1.1.2 : YDR268W<br>6.1.1.1 : YGR185C<br>6.1.1.12 : YLL018C<br>6.1.1.22 : YHR019C<br>6.1.1.7 : YOR335C<br>6.1.1.9 : YGR094W<br>6.1.1.4 : YPL160W<br>6.1.1.5 : YBL076C<br>6.1.1.17 : YGL245W<br>6.1.1.18 : YOR168W<br>6.1.1.16 : YNL247W<br>6.1.1.19 : YDR341C |
| 10     | 8.36             | 153             | 136            | 17             | 37         | 6.1.1.14 : YBR121C<br>6.1.1.21 : YPR033C<br>6.1.1.6 : YDR037W<br>6.1.1.10 : YGR264C<br>6.1.1.20 : 1887<br>6.1.1.15 : YHR020W<br>6.1.1.11 : YDR023W<br>6.1.1.3 : 2924<br>6.1.1.2 : YOL097C<br>6.1.1.1 : YGR185C<br>6.1.1.12 : YLL018C<br>6.1.1.22 : YHR019C<br>6.1.1.7 : YOR335C<br>6.1.1.9 : YGR094W<br>6.1.1.4 : YPL160W<br>6.1.1.5 : YBL076C<br>6.1.1.17 : YGL245W<br>6.1.1.18 : YOR168W<br>6.1.1.16 : YNL247W<br>6.1.1.19 : YHR091C |
| ...    |                  |                 |                |                |            |                                                                                                                                                                                                                                                                                                                                                                                                                                        |
| ...    |                  |                 |                |                |            |                                                                                                                                                                                                                                                                                                                                                                                                                                        |

**Assignments for the pathway "tRNA charging pathway" (rosetta data set). There are 49152 possible assignments of genes to reactions(only the 10 highest scoring and the 10 lowest scoring assignments are displayed).**

| Number | Normalized Score | Number of Pairs | Positive Pairs | Negative Pairs | Zero Pairs | Assignments                                                                                                                                                                                                                                                                                                                                                                                                                               |
|--------|------------------|-----------------|----------------|----------------|------------|-------------------------------------------------------------------------------------------------------------------------------------------------------------------------------------------------------------------------------------------------------------------------------------------------------------------------------------------------------------------------------------------------------------------------------------------|
| 49143  | 1.18             | 171             | 90             | 81             | 19         | 6.1.1.14 : YPR081C<br>6.1.1.21 : YPR033C<br>6.1.1.6 : YDR037W<br>6.1.1.10 : YGR171C<br>6.1.1.20 : YLR060W<br>6.1.1.15 : YHR020W<br>6.1.1.11 : YHR011W<br>6.1.1.3 : 2924<br>6.1.1.2 : YDR268W<br>6.1.1.1 : YPL097W<br>6.1.1.12 : YPL104W<br>6.1.1.22 : YCR024C<br>6.1.1.7 : YOR335C<br>6.1.1.9 : YGR094W<br>6.1.1.4 : YPL160W<br>6.1.1.5 : YPL040C<br>6.1.1.17 : YOL033W<br>6.1.1.18 : YOR168W<br>6.1.1.16 : YNL247W<br>6.1.1.19 : YHR091C |
| 49144  | 1.17             | 171             | 90             | 81             | 19         | 6.1.1.14 : YPR081C<br>6.1.1.21 : YPR033C<br>6.1.1.6 : YDR037W<br>6.1.1.10 : YGR171C<br>6.1.1.20 : YLR060W<br>6.1.1.15 : YER087W<br>6.1.1.11 : YHR011W<br>6.1.1.3 : 2924<br>6.1.1.2 : YDR268W<br>6.1.1.1 : YPL097W<br>6.1.1.12 : YPL104W<br>6.1.1.22 : YCR024C<br>6.1.1.7 : YOR335C<br>6.1.1.9 : YGR094W<br>6.1.1.4 : YPL160W<br>6.1.1.5 : YPL040C<br>6.1.1.17 : YOL033W<br>6.1.1.18 : YOR168W<br>6.1.1.16 : YNL247W<br>6.1.1.19 : YHR091C |

Assignments for the pathway "tRNA charging pathway" (rosetta data set). There are 49152 possible assignments of genes to reactions(only the 10 highest scoring and the 10 lowest scoring assignments are displayed).

| Number | Normalized Score | Number of Pairs | Positive Pairs | Negative Pairs | Zero Pairs | Assignments                                                                                                                                                                                                                                                                                                                                                                                                                            |
|--------|------------------|-----------------|----------------|----------------|------------|----------------------------------------------------------------------------------------------------------------------------------------------------------------------------------------------------------------------------------------------------------------------------------------------------------------------------------------------------------------------------------------------------------------------------------------|
| 49145  | 1.17             | 153             | 83             | 70             | 37         | 6.1.1.14 : YPR081C<br>6.1.1.21 : YPR033C<br>6.1.1.6 : YDR037W<br>6.1.1.10 : YGR171C<br>6.1.1.20 : 1887<br>6.1.1.15 : YER087W<br>6.1.1.11 : YHR011W<br>6.1.1.3 : 2924<br>6.1.1.2 : YDR268W<br>6.1.1.1 : YPL097W<br>6.1.1.12 : YLL018C<br>6.1.1.22 : YCR024C<br>6.1.1.7 : YOR335C<br>6.1.1.9 : YGR094W<br>6.1.1.4 : YPL160W<br>6.1.1.5 : YPL040C<br>6.1.1.17 : YOL033W<br>6.1.1.18 : YOR168W<br>6.1.1.16 : YNL247W<br>6.1.1.19 : YHR091C |
| 49146  | 1.16             | 153             | 85             | 68             | 37         | 6.1.1.14 : YPR081C<br>6.1.1.21 : YPR033C<br>6.1.1.6 : YDR037W<br>6.1.1.10 : YGR171C<br>6.1.1.20 : 1887<br>6.1.1.15 : YHR020W<br>6.1.1.11 : YHR011W<br>6.1.1.3 : 2924<br>6.1.1.2 : YDR268W<br>6.1.1.1 : YPL097W<br>6.1.1.12 : YPL104W<br>6.1.1.22 : YCR024C<br>6.1.1.7 : YOR335C<br>6.1.1.9 : YGR094W<br>6.1.1.4 : YLR382C<br>6.1.1.5 : YPL040C<br>6.1.1.17 : YOL033W<br>6.1.1.18 : YOR168W<br>6.1.1.16 : YNL247W<br>6.1.1.19 : YHR091C |

Assignments for the pathway "tRNA charging pathway" (rosetta data set). There are 49152 possible assignments of genes to reactions(only the 10 highest scoring and the 10 lowest scoring assignments are displayed).

| Number | Normalized Score | Number of Pairs | Positive Pairs | Negative Pairs | Zero Pairs | Assignments                                                                                                                                                                                                                                                                                                                                                                                                                               |
|--------|------------------|-----------------|----------------|----------------|------------|-------------------------------------------------------------------------------------------------------------------------------------------------------------------------------------------------------------------------------------------------------------------------------------------------------------------------------------------------------------------------------------------------------------------------------------------|
| 49147  | 1.15             | 171             | 94             | 77             | 19         | 6.1.1.14 : YPR081C<br>6.1.1.21 : YPR033C<br>6.1.1.6 : YDR037W<br>6.1.1.10 : YGR171C<br>6.1.1.20 : 1887<br>6.1.1.15 : YER087W<br>6.1.1.11 : YHR011W<br>6.1.1.3 : YKL194C<br>6.1.1.2 : YDR268W<br>6.1.1.1 : YPL097W<br>6.1.1.12 : YPL104W<br>6.1.1.22 : YCR024C<br>6.1.1.7 : YOR335C<br>6.1.1.9 : YGR094W<br>6.1.1.4 : YPL160W<br>6.1.1.5 : YPL040C<br>6.1.1.17 : YGL245W<br>6.1.1.18 : YOR168W<br>6.1.1.16 : YNL247W<br>6.1.1.19 : YHR091C |
| 49148  | 1.15             | 171             | 93             | 78             | 19         | 6.1.1.14 : YPR081C<br>6.1.1.21 : YPR033C<br>6.1.1.6 : YDR037W<br>6.1.1.10 : YGR171C<br>6.1.1.20 : 1887<br>6.1.1.15 : YHR020W<br>6.1.1.11 : YHR011W<br>6.1.1.3 : YKL194C<br>6.1.1.2 : YDR268W<br>6.1.1.1 : YPL097W<br>6.1.1.12 : YPL104W<br>6.1.1.22 : YCR024C<br>6.1.1.7 : YOR335C<br>6.1.1.9 : YGR094W<br>6.1.1.4 : YPL160W<br>6.1.1.5 : YPL040C<br>6.1.1.17 : YOL033W<br>6.1.1.18 : YOR168W<br>6.1.1.16 : YNL247W<br>6.1.1.19 : YHR091C |

Assignments for the pathway "tRNA charging pathway" (rosetta data set). There are 49152 possible assignments of genes to reactions(only the 10 highest scoring and the 10 lowest scoring assignments are displayed).



| Number | Normalized Score | Number of Pairs | Positive Pairs | Negative Pairs | Zero Pairs | Assignments                                                                                                                                                                                                                                                                                                                                                                                                                            |
|--------|------------------|-----------------|----------------|----------------|------------|----------------------------------------------------------------------------------------------------------------------------------------------------------------------------------------------------------------------------------------------------------------------------------------------------------------------------------------------------------------------------------------------------------------------------------------|
| 49149  | 1.15             | 153             | 80             | 73             | 37         | 6.1.1.14 : YPR081C<br>6.1.1.21 : YPR033C<br>6.1.1.6 : YDR037W<br>6.1.1.10 : YGR171C<br>6.1.1.20 : 1887<br>6.1.1.15 : YHR020W<br>6.1.1.11 : YHR011W<br>6.1.1.3 : 2924<br>6.1.1.2 : YDR268W<br>6.1.1.1 : YPL097W<br>6.1.1.12 : YPL104W<br>6.1.1.22 : YCR024C<br>6.1.1.7 : YOR335C<br>6.1.1.9 : YGR094W<br>6.1.1.4 : YLR382C<br>6.1.1.5 : YPL040C<br>6.1.1.17 : YOL033W<br>6.1.1.18 : YOR168W<br>6.1.1.16 : YNL247W<br>6.1.1.19 : YDR341C |
| 49150  | 1.12             | 153             | 81             | 72             | 37         | 6.1.1.14 : YPR081C<br>6.1.1.21 : YPR033C<br>6.1.1.6 : YDR037W<br>6.1.1.10 : YGR171C<br>6.1.1.20 : 1887<br>6.1.1.15 : YHR020W<br>6.1.1.11 : YHR011W<br>6.1.1.3 : 2924<br>6.1.1.2 : YDR268W<br>6.1.1.1 : YPL097W<br>6.1.1.12 : YPL104W<br>6.1.1.22 : YCR024C<br>6.1.1.7 : YOR335C<br>6.1.1.9 : YGR094W<br>6.1.1.4 : YPL160W<br>6.1.1.5 : YPL040C<br>6.1.1.17 : YOL033W<br>6.1.1.18 : YOR168W<br>6.1.1.16 : YNL247W<br>6.1.1.19 : YHR091C |

Assignments for the pathway "tRNA charging pathway" (rosetta data set). There are 49152 possible assignments of genes to reactions(only the 10 highest scoring and the 10 lowest scoring assignments are displayed).

| Number | Normalized Score | Number of Pairs | Positive Pairs | Negative Pairs | Zero Pairs | Assignments                                                                                                                                                                                                                                                                                                                                                                                                                            |
|--------|------------------|-----------------|----------------|----------------|------------|----------------------------------------------------------------------------------------------------------------------------------------------------------------------------------------------------------------------------------------------------------------------------------------------------------------------------------------------------------------------------------------------------------------------------------------|
| 49151  | 1.10             | 153             | 82             | 71             | 37         | 6.1.1.14 : YPR081C<br>6.1.1.21 : YPR033C<br>6.1.1.6 : YDR037W<br>6.1.1.10 : YGR171C<br>6.1.1.20 : 1887<br>6.1.1.15 : YER087W<br>6.1.1.11 : YHR011W<br>6.1.1.3 : 2924<br>6.1.1.2 : YDR268W<br>6.1.1.1 : YPL097W<br>6.1.1.12 : YPL104W<br>6.1.1.22 : YCR024C<br>6.1.1.7 : YOR335C<br>6.1.1.9 : YGR094W<br>6.1.1.4 : YPL160W<br>6.1.1.5 : YPL040C<br>6.1.1.17 : YGL245W<br>6.1.1.18 : YOR168W<br>6.1.1.16 : YNL247W<br>6.1.1.19 : YHR091C |

Table 1: **Assignments for the pathway "tRNA charging pathway" (rosetta data set). There are 49152 possible assignments of genes to reactions(only the 10 highest scoring and the 10 lowest scoring assignments are displayed).**

| Number | Normalized Score | Number of Pairs | Positive Pairs | Negative Pairs | Zero Pairs | Assignments                                                                                                                                                                                |
|--------|------------------|-----------------|----------------|----------------|------------|--------------------------------------------------------------------------------------------------------------------------------------------------------------------------------------------|
| 1      | 9.92             | 28              | 25             | 3              | 8          | 1.1.99.5 : YIL155C<br>2.7.1.40 : YOR347C<br>4.2.1.11 : YHR174W<br>5.4.2.1 : YDL021W<br>2.7.2.3 : 639<br>1.2.1.12 : YGR192C<br>5.3.1.1 : YDR050C<br>1.1.1.8 : YDL022W<br>2.7.1.30 : YHL032C |
| 2      | 9.73             | 28              | 23             | 5              | 8          | 1.1.99.5 : YIL155C<br>2.7.1.40 : YOR347C<br>4.2.1.11 : YHR174W<br>5.4.2.1 : YKL152C<br>2.7.2.3 : 639<br>1.2.1.12 : YGR192C<br>5.3.1.1 : YDR050C<br>1.1.1.8 : YDL022W<br>2.7.1.30 : YHL032C |

Assignments for the pathway "aerobic glycerol degradation II" (rosetta data set). There are 180 possible assignments of genes to reactions(only the 10 highest scoring and the 10 lowest scoring assignments are displayed).

| Number | Normalized Score | Number of Pairs | Positive Pairs | Negative Pairs | Zero Pairs | Assignments                                                                                                                                                                                |
|--------|------------------|-----------------|----------------|----------------|------------|--------------------------------------------------------------------------------------------------------------------------------------------------------------------------------------------|
| 3      | 9.54             | 28              | 22             | 6              | 8          | 1.1.99.5 : YIL155C<br>2.7.1.40 : YAL038W<br>4.2.1.11 : YHR174W<br>5.4.2.1 : YKL152C<br>2.7.2.3 : 639<br>1.2.1.12 : YJL052W<br>5.3.1.1 : YDR050C<br>1.1.1.8 : YDL022W<br>2.7.1.30 : YHL032C |
| 4      | 9.38             | 28              | 22             | 6              | 8          | 1.1.99.5 : YIL155C<br>2.7.1.40 : YAL038W<br>4.2.1.11 : YHR174W<br>5.4.2.1 : YKL152C<br>2.7.2.3 : 639<br>1.2.1.12 : YGR192C<br>5.3.1.1 : YDR050C<br>1.1.1.8 : YDL022W<br>2.7.1.30 : YHL032C |
| 5      | 9.37             | 28              | 25             | 3              | 8          | 1.1.99.5 : YIL155C<br>2.7.1.40 : YOR347C<br>4.2.1.11 : YGR254W<br>5.4.2.1 : YDL021W<br>2.7.2.3 : 639<br>1.2.1.12 : YGR192C<br>5.3.1.1 : YDR050C<br>1.1.1.8 : YDL022W<br>2.7.1.30 : YHL032C |
| 6      | 9.07             | 28              | 23             | 5              | 8          | 1.1.99.5 : YIL155C<br>2.7.1.40 : YOR347C<br>4.2.1.11 : YGR254W<br>5.4.2.1 : YKL152C<br>2.7.2.3 : 639<br>1.2.1.12 : YGR192C<br>5.3.1.1 : YDR050C<br>1.1.1.8 : YDL022W<br>2.7.1.30 : YHL032C |
| 7      | 8.98             | 28              | 22             | 6              | 8          | 1.1.99.5 : YIL155C<br>2.7.1.40 : YAL038W<br>4.2.1.11 : YGR254W<br>5.4.2.1 : YKL152C<br>2.7.2.3 : 639<br>1.2.1.12 : YJL052W<br>5.3.1.1 : YDR050C<br>1.1.1.8 : YDL022W<br>2.7.1.30 : YHL032C |

Assignments for the pathway "aerobic glycerol degradation II" (rosetta data set). There are 180 possible assignments of genes to reactions(only the 10 highest scoring and the 10 lowest scoring assignments are displayed).

| Number | Normalized Score | Number of Pairs | Positive Pairs | Negative Pairs | Zero Pairs | Assignments                                                                                                                                                                                |
|--------|------------------|-----------------|----------------|----------------|------------|--------------------------------------------------------------------------------------------------------------------------------------------------------------------------------------------|
| 8      | 8.96             | 28              | 23             | 5              | 8          | 1.1.99.5 : YIL155C<br>2.7.1.40 : YOR347C<br>4.2.1.11 : YHR174W<br>5.4.2.1 : YKL152C<br>2.7.2.3 : 639<br>1.2.1.12 : YJL052W<br>5.3.1.1 : YDR050C<br>1.1.1.8 : YDL022W<br>2.7.1.30 : YHL032C |
| 9      | 8.83             | 28              | 22             | 6              | 8          | 1.1.99.5 : YIL155C<br>2.7.1.40 : YAL038W<br>4.2.1.11 : YGR254W<br>5.4.2.1 : YKL152C<br>2.7.2.3 : 639<br>1.2.1.12 : YGR192C<br>5.3.1.1 : YDR050C<br>1.1.1.8 : YDL022W<br>2.7.1.30 : YHL032C |
| 10     | 8.63             | 28              | 25             | 3              | 8          | 1.1.99.5 : YIL155C<br>2.7.1.40 : YOR347C<br>4.2.1.11 : YOR393W<br>5.4.2.1 : YDL021W<br>2.7.2.3 : 639<br>1.2.1.12 : YGR192C<br>5.3.1.1 : YDR050C<br>1.1.1.8 : YDL022W<br>2.7.1.30 : YHL032C |
| ...    |                  |                 |                |                |            |                                                                                                                                                                                            |
| ...    |                  |                 |                |                |            |                                                                                                                                                                                            |
| 171    | 2.23             | 28              | 19             | 9              | 8          | 1.1.99.5 : YIL155C<br>2.7.1.40 : YAL038W<br>4.2.1.11 : YMR323W<br>5.4.2.1 : YOL056W<br>2.7.2.3 : 639<br>1.2.1.12 : YJR009C<br>5.3.1.1 : YDR050C<br>1.1.1.8 : YOL059W<br>2.7.1.30 : YHL032C |
| 172    | 2.21             | 28              | 20             | 8              | 8          | 1.1.99.5 : YIL155C<br>2.7.1.40 : YOR347C<br>4.2.1.11 : YMR323W<br>5.4.2.1 : YOL056W<br>2.7.2.3 : 639<br>1.2.1.12 : YJL052W<br>5.3.1.1 : YDR050C<br>1.1.1.8 : YOL059W<br>2.7.1.30 : YHL032C |

Assignments for the pathway "aerobic glycerol degradation II" (rosetta data set). There are 180 possible assignments of genes to reactions(only the 10 highest scoring and the 10 lowest scoring assignments are displayed).

| Number | Normalized Score | Number of Pairs | Positive Pairs | Negative Pairs | Zero Pairs | Assignments                                                                                                                                                                                |
|--------|------------------|-----------------|----------------|----------------|------------|--------------------------------------------------------------------------------------------------------------------------------------------------------------------------------------------|
| 173    | 2.04             | 28              | 17             | 11             | 8          | 1.1.99.5 : YIL155C<br>2.7.1.40 : YAL038W<br>4.2.1.11 : YPL281C<br>5.4.2.1 : YOL056W<br>2.7.2.3 : 639<br>1.2.1.12 : YJR009C<br>5.3.1.1 : YDR050C<br>1.1.1.8 : YDL022W<br>2.7.1.30 : YHL032C |
| 174    | 1.98             | 28              | 16             | 12             | 8          | 1.1.99.5 : YIL155C<br>2.7.1.40 : YOR347C<br>4.2.1.11 : YPL281C<br>5.4.2.1 : YOL056W<br>2.7.2.3 : 639<br>1.2.1.12 : YJR009C<br>5.3.1.1 : YDR050C<br>1.1.1.8 : YDL022W<br>2.7.1.30 : YHL032C |
| 175    | 1.57             | 28              | 16             | 12             | 8          | 1.1.99.5 : YIL155C<br>2.7.1.40 : YAL038W<br>4.2.1.11 : YPL281C<br>5.4.2.1 : YOL056W<br>2.7.2.3 : 639<br>1.2.1.12 : YJR009C<br>5.3.1.1 : YDR050C<br>1.1.1.8 : YOL059W<br>2.7.1.30 : YHL032C |
| 176    | 1.55             | 28              | 17             | 11             | 8          | 1.1.99.5 : YIL155C<br>2.7.1.40 : YOR347C<br>4.2.1.11 : YPL281C<br>5.4.2.1 : YOL056W<br>2.7.2.3 : 639<br>1.2.1.12 : YJL052W<br>5.3.1.1 : YDR050C<br>1.1.1.8 : YOL059W<br>2.7.1.30 : YHL032C |
| 177    | 1.52             | 28              | 19             | 9              | 8          | 1.1.99.5 : YIL155C<br>2.7.1.40 : YOR347C<br>4.2.1.11 : YOR393W<br>5.4.2.1 : YOL056W<br>2.7.2.3 : 639<br>1.2.1.12 : YJR009C<br>5.3.1.1 : YDR050C<br>1.1.1.8 : YOL059W<br>2.7.1.30 : YHL032C |

Assignments for the pathway "aerobic glycerol degradation II" (rosetta data set). There are 180 possible assignments of genes to reactions(only the 10 highest scoring and the 10 lowest scoring assignments are displayed).

| Number | Normalized Score | Number of Pairs | Positive Pairs | Negative Pairs | Zero Pairs | Assignments                                                                                                                                                                                |
|--------|------------------|-----------------|----------------|----------------|------------|--------------------------------------------------------------------------------------------------------------------------------------------------------------------------------------------|
| 178    | 1.32             | 28              | 18             | 10             | 8          | 1.1.99.5 : YIL155C<br>2.7.1.40 : YOR347C<br>4.2.1.11 : YMR323W<br>5.4.2.1 : YOL056W<br>2.7.2.3 : 639<br>1.2.1.12 : YJR009C<br>5.3.1.1 : YDR050C<br>1.1.1.8 : YOL059W<br>2.7.1.30 : YHL032C |
| 179    | 0.67             | 28              | 15             | 13             | 8          | 1.1.99.5 : YIL155C<br>2.7.1.40 : YOR347C<br>4.2.1.11 : YPL281C<br>5.4.2.1 : YOL056W<br>2.7.2.3 : 639<br>1.2.1.12 : YJR009C<br>5.3.1.1 : YDR050C<br>1.1.1.8 : YOL059W<br>2.7.1.30 : YHL032C |

Table 2: Assignments for the pathway "aerobic glycerol degradation II" (rosetta data set). There are 180 possible assignments of genes to reactions(only the 10 highest scoring and the 10 lowest scoring assignments are displayed).

| Number | Normalized Score | Number of Pairs | Positive Pairs | Negative Pairs | Zero Pairs | Assignments                                                                                                                                                                                |
|--------|------------------|-----------------|----------------|----------------|------------|--------------------------------------------------------------------------------------------------------------------------------------------------------------------------------------------|
| 1      | 16.01            | 28              | 28             | 0              | 8          | 5.3.1.9 : YBR196C<br>2.7.1.11 : YMR205C<br>4.1.2.13 : YKL060C<br>5.3.1.1 : YDR050C<br>1.2.1.12 : YJL052W<br>2.7.2.3 : 639<br>5.4.2.1 : YKL152C<br>4.2.1.11 : YHR174W<br>2.7.1.40 : YAL038W |
| 2      | 15.72            | 28              | 28             | 0              | 8          | 5.3.1.9 : YBR196C<br>2.7.1.11 : YGR240C<br>4.1.2.13 : YKL060C<br>5.3.1.1 : YDR050C<br>1.2.1.12 : YJL052W<br>2.7.2.3 : 639<br>5.4.2.1 : YKL152C<br>4.2.1.11 : YHR174W<br>2.7.1.40 : YAL038W |

Assignments for the pathway "glycolysis" (rosetta data set). There are 180 possible assignments of genes to reactions(only the 10 highest scoring and the 10 lowest scoring assignments are displayed).

| Number | Normalized Score | Number of Pairs | Positive Pairs | Negative Pairs | Zero Pairs | Assignments                                                                                                                                                                                |
|--------|------------------|-----------------|----------------|----------------|------------|--------------------------------------------------------------------------------------------------------------------------------------------------------------------------------------------|
| 3      | 15.05            | 28              | 28             | 0              | 8          | 5.3.1.9 : YBR196C<br>2.7.1.11 : YMR205C<br>4.1.2.13 : YKL060C<br>5.3.1.1 : YDR050C<br>1.2.1.12 : YJL052W<br>2.7.2.3 : 639<br>5.4.2.1 : YKL152C<br>4.2.1.11 : YGR254W<br>2.7.1.40 : YAL038W |
| 4      | 15.01            | 28              | 28             | 0              | 8          | 5.3.1.9 : YBR196C<br>2.7.1.11 : YGR240C<br>4.1.2.13 : YKL060C<br>5.3.1.1 : YDR050C<br>1.2.1.12 : YJL052W<br>2.7.2.3 : 639<br>5.4.2.1 : YKL152C<br>4.2.1.11 : YGR254W<br>2.7.1.40 : YAL038W |
| 5      | 14.49            | 28              | 28             | 0              | 8          | 5.3.1.9 : YBR196C<br>2.7.1.11 : YMR205C<br>4.1.2.13 : YKL060C<br>5.3.1.1 : YDR050C<br>1.2.1.12 : YGR192C<br>2.7.2.3 : 639<br>5.4.2.1 : YKL152C<br>4.2.1.11 : YHR174W<br>2.7.1.40 : YAL038W |
| 6      | 14.27            | 28              | 28             | 0              | 8          | 5.3.1.9 : YBR196C<br>2.7.1.11 : YGR240C<br>4.1.2.13 : YKL060C<br>5.3.1.1 : YDR050C<br>1.2.1.12 : YGR192C<br>2.7.2.3 : 639<br>5.4.2.1 : YKL152C<br>4.2.1.11 : YHR174W<br>2.7.1.40 : YAL038W |
| 7      | 14.15            | 28              | 28             | 0              | 8          | 5.3.1.9 : YBR196C<br>2.7.1.11 : YGR240C<br>4.1.2.13 : YKL060C<br>5.3.1.1 : YDR050C<br>1.2.1.12 : YJL052W<br>2.7.2.3 : 639<br>5.4.2.1 : YKL152C<br>4.2.1.11 : YHR174W<br>2.7.1.40 : YOR347C |

Assignments for the pathway "glycolysis" (rosetta data set). There are 180 possible assignments of genes to reactions(only the 10 highest scoring and the 10 lowest scoring assignments are displayed).

| Number | Normalized Score | Number of Pairs | Positive Pairs | Negative Pairs | Zero Pairs | Assignments                                                                                                                                                                                |
|--------|------------------|-----------------|----------------|----------------|------------|--------------------------------------------------------------------------------------------------------------------------------------------------------------------------------------------|
| 8      | 13.96            | 28              | 28             | 0              | 8          | 5.3.1.9 : YBR196C<br>2.7.1.11 : YMR205C<br>4.1.2.13 : YKL060C<br>5.3.1.1 : YDR050C<br>1.2.1.12 : YJL052W<br>2.7.2.3 : 639<br>5.4.2.1 : YKL152C<br>4.2.1.11 : YHR174W<br>2.7.1.40 : YOR347C |
| 9      | 13.63            | 28              | 28             | 0              | 8          | 5.3.1.9 : YBR196C<br>2.7.1.11 : YGR240C<br>4.1.2.13 : YKL060C<br>5.3.1.1 : YDR050C<br>1.2.1.12 : YGR192C<br>2.7.2.3 : 639<br>5.4.2.1 : YKL152C<br>4.2.1.11 : YHR174W<br>2.7.1.40 : YOR347C |
| 10     | 13.57            | 28              | 28             | 0              | 8          | 5.3.1.9 : YBR196C<br>2.7.1.11 : YGR240C<br>4.1.2.13 : YKL060C<br>5.3.1.1 : YDR050C<br>1.2.1.12 : YGR192C<br>2.7.2.3 : 639<br>5.4.2.1 : YKL152C<br>4.2.1.11 : YGR254W<br>2.7.1.40 : YAL038W |
| ...    |                  |                 |                |                |            |                                                                                                                                                                                            |
| ...    |                  |                 |                |                |            |                                                                                                                                                                                            |
| 171    | 5.98             | 28              | 23             | 5              | 8          | 5.3.1.9 : YBR196C<br>2.7.1.11 : YGR240C<br>4.1.2.13 : YKL060C<br>5.3.1.1 : YDR050C<br>1.2.1.12 : YJR009C<br>2.7.2.3 : 639<br>5.4.2.1 : YDL021W<br>4.2.1.11 : YMR323W<br>2.7.1.40 : YAL038W |
| 172    | 5.96             | 28              | 24             | 4              | 8          | 5.3.1.9 : YBR196C<br>2.7.1.11 : YGR240C<br>4.1.2.13 : YKL060C<br>5.3.1.1 : YDR050C<br>1.2.1.12 : YJR009C<br>2.7.2.3 : 639<br>5.4.2.1 : YOL056W<br>4.2.1.11 : YMR323W<br>2.7.1.40 : YAL038W |

Assignments for the pathway "glycolysis" (rosetta data set). There are 180 possible assignments of genes to reactions(only the 10 highest scoring and the 10 lowest scoring assignments are displayed).



| Number | Normalized Score | Number of Pairs | Positive Pairs | Negative Pairs | Zero Pairs | Assignments                                                                                                                                                                                |
|--------|------------------|-----------------|----------------|----------------|------------|--------------------------------------------------------------------------------------------------------------------------------------------------------------------------------------------|
| 173    | 5.95             | 28              | 23             | 5              | 8          | 5.3.1.9 : YBR196C<br>2.7.1.11 : YMR205C<br>4.1.2.13 : YKL060C<br>5.3.1.1 : YDR050C<br>1.2.1.12 : YJR009C<br>2.7.2.3 : 639<br>5.4.2.1 : YDL021W<br>4.2.1.11 : YMR323W<br>2.7.1.40 : YOR347C |
| 174    | 5.73             | 28              | 25             | 3              | 8          | 5.3.1.9 : YBR196C<br>2.7.1.11 : YGR240C<br>4.1.2.13 : YKL060C<br>5.3.1.1 : YDR050C<br>1.2.1.12 : YJR009C<br>2.7.2.3 : 639<br>5.4.2.1 : YOL056W<br>4.2.1.11 : YOR393W<br>2.7.1.40 : YOR347C |
| 175    | 5.48             | 28              | 25             | 3              | 8          | 5.3.1.9 : YBR196C<br>2.7.1.11 : YMR205C<br>4.1.2.13 : YKL060C<br>5.3.1.1 : YDR050C<br>1.2.1.12 : YJR009C<br>2.7.2.3 : 639<br>5.4.2.1 : YOL056W<br>4.2.1.11 : YOR393W<br>2.7.1.40 : YOR347C |
| 176    | 5.27             | 28              | 24             | 4              | 8          | 5.3.1.9 : YBR196C<br>2.7.1.11 : YGR240C<br>4.1.2.13 : YKL060C<br>5.3.1.1 : YDR050C<br>1.2.1.12 : YJR009C<br>2.7.2.3 : 639<br>5.4.2.1 : YOL056W<br>4.2.1.11 : YPL281C<br>2.7.1.40 : YOR347C |
| 177    | 4.91             | 28              | 22             | 6              | 8          | 5.3.1.9 : YBR196C<br>2.7.1.11 : YGR240C<br>4.1.2.13 : YKL060C<br>5.3.1.1 : YDR050C<br>1.2.1.12 : YJR009C<br>2.7.2.3 : 639<br>5.4.2.1 : YOL056W<br>4.2.1.11 : YMR323W<br>2.7.1.40 : YOR347C |

Assignments for the pathway "glycolysis" (rosetta data set). There are 180 possible assignments of genes to reactions(only the 10 highest scoring and the 10 lowest scoring assignments are displayed).

| Number | Normalized Score | Number of Pairs | Positive Pairs | Negative Pairs | Zero Pairs | Assignments                                                                                                                                                                                |
|--------|------------------|-----------------|----------------|----------------|------------|--------------------------------------------------------------------------------------------------------------------------------------------------------------------------------------------|
| 178    | 4.84             | 28              | 23             | 5              | 8          | 5.3.1.9 : YBR196C<br>2.7.1.11 : YMR205C<br>4.1.2.13 : YKL060C<br>5.3.1.1 : YDR050C<br>1.2.1.12 : YJR009C<br>2.7.2.3 : 639<br>5.4.2.1 : YOL056W<br>4.2.1.11 : YMR323W<br>2.7.1.40 : YOR347C |
| 179    | 4.80             | 28              | 23             | 5              | 8          | 5.3.1.9 : YBR196C<br>2.7.1.11 : YMR205C<br>4.1.2.13 : YKL060C<br>5.3.1.1 : YDR050C<br>1.2.1.12 : YJR009C<br>2.7.2.3 : 639<br>5.4.2.1 : YOL056W<br>4.2.1.11 : YPL281C<br>2.7.1.40 : YOR347C |

Table 3: Assignments for the pathway "glycolysis" (rosetta data set). There are 180 possible assignments of genes to reactions(only the 10 highest scoring and the 10 lowest scoring assignments are displayed).

| Number | Normalized Score | Number of Pairs | Positive Pairs | Negative Pairs | Zero Pairs | Assignments                                                                                            |
|--------|------------------|-----------------|----------------|----------------|------------|--------------------------------------------------------------------------------------------------------|
| 1      | 5.02             | 10              | 7              | 3              | 0          | 4.2.1.3 : YLR304C<br>4.1.3.7 : YNR001C<br>4.1.3.1 : YPR006C<br>4.1.3.2 : YIR031C<br>1.1.1.37 : YDL078C |
| 2      | 4.93             | 10              | 9              | 1              | 0          | 4.2.1.3 : YJL200C<br>4.1.3.7 : YPR001W<br>4.1.3.1 : YER065C<br>4.1.3.2 : YIR031C<br>1.1.1.37 : YDL078C |
| 3      | 4.76             | 10              | 9              | 1              | 0          | 4.2.1.3 : YJL200C<br>4.1.3.7 : YPR001W<br>4.1.3.1 : YER065C<br>4.1.3.2 : YNL117W<br>1.1.1.37 : YDL078C |
| 4      | 4.76             | 10              | 6              | 4              | 0          | 4.2.1.3 : YLR304C<br>4.1.3.7 : YNR001C<br>4.1.3.1 : YPR006C<br>4.1.3.2 : YNL117W<br>1.1.1.37 : YKL085W |

Assignments for the pathway "glyoxylate cycle" (rosetta data set). There are 72 possible assignments of genes to reactions.

| Number | Normalized Score | Number of Pairs | Positive Pairs | Negative Pairs | Zero Pairs | Assignments                                                                                            |
|--------|------------------|-----------------|----------------|----------------|------------|--------------------------------------------------------------------------------------------------------|
| 5      | 4.74             | 10              | 8              | 2              | 0          | 4.2.1.3 : YLR304C<br>4.1.3.7 : YNR001C<br>4.1.3.1 : YPR006C<br>4.1.3.2 : YNL117W<br>1.1.1.37 : YDL078C |
| 6      | 4.41             | 10              | 5              | 5              | 0          | 4.2.1.3 : YLR304C<br>4.1.3.7 : YNR001C<br>4.1.3.1 : YPR006C<br>4.1.3.2 : YIR031C<br>1.1.1.37 : YKL085W |
| 7      | 4.32             | 10              | 9              | 1              | 0          | 4.2.1.3 : YLR304C<br>4.1.3.7 : YCR005C<br>4.1.3.1 : YPR006C<br>4.1.3.2 : YNL117W<br>1.1.1.37 : YDL078C |
| 8      | 4.22             | 10              | 7              | 3              | 0          | 4.2.1.3 : YLR304C<br>4.1.3.7 : YCR005C<br>4.1.3.1 : YPR006C<br>4.1.3.2 : YIR031C<br>1.1.1.37 : YDL078C |
| 9      | 3.82             | 10              | 6              | 4              | 0          | 4.2.1.3 : YJL200C<br>4.1.3.7 : YPR001W<br>4.1.3.1 : YER065C<br>4.1.3.2 : YNL117W<br>1.1.1.37 : YOL126C |
| 10     | 3.55             | 10              | 6              | 4              | 0          | 4.2.1.3 : YJL200C<br>4.1.3.7 : YPR001W<br>4.1.3.1 : YPR006C<br>4.1.3.2 : YIR031C<br>1.1.1.37 : YDL078C |
| 11     | 3.51             | 10              | 6              | 4              | 0          | 4.2.1.3 : YJL200C<br>4.1.3.7 : YPR001W<br>4.1.3.1 : YER065C<br>4.1.3.2 : YIR031C<br>1.1.1.37 : YOL126C |
| 12     | 3.37             | 10              | 6              | 4              | 0          | 4.2.1.3 : YJL200C<br>4.1.3.7 : YPR001W<br>4.1.3.1 : YPR006C<br>4.1.3.2 : YNL117W<br>1.1.1.37 : YDL078C |
| 13     | 3.22             | 10              | 7              | 3              | 0          | 4.2.1.3 : YLR304C<br>4.1.3.7 : YNR001C<br>4.1.3.1 : YER065C<br>4.1.3.2 : YIR031C<br>1.1.1.37 : YDL078C |

**Assignments for the pathway "glyoxylate cycle" (rosetta data set). There are 72 possible assignments of genes to reactions.**

| Number | Normalized Score | Number of Pairs | Positive Pairs | Negative Pairs | Zero Pairs | Assignments                                                                                            |
|--------|------------------|-----------------|----------------|----------------|------------|--------------------------------------------------------------------------------------------------------|
| 14     | 3.19             | 10              | 6              | 4              | 0          | 4.2.1.3 : YLR304C<br>4.1.3.7 : YCR005C<br>4.1.3.1 : YPR006C<br>4.1.3.2 : YNL117W<br>1.1.1.37 : YKL085W |
| 15     | 3.11             | 10              | 6              | 4              | 0          | 4.2.1.3 : YLR304C<br>4.1.3.7 : YNR001C<br>4.1.3.1 : YPR006C<br>4.1.3.2 : YNL117W<br>1.1.1.37 : YOL126C |
| 16     | 3.02             | 10              | 6              | 4              | 0          | 4.2.1.3 : YLR304C<br>4.1.3.7 : YNR001C<br>4.1.3.1 : YER065C<br>4.1.3.2 : YNL117W<br>1.1.1.37 : YKL085W |
| 17     | 2.96             | 10              | 8              | 2              | 0          | 4.2.1.3 : YLR304C<br>4.1.3.7 : YNR001C<br>4.1.3.1 : YER065C<br>4.1.3.2 : YNL117W<br>1.1.1.37 : YDL078C |
| 18     | 2.92             | 10              | 5              | 5              | 0          | 4.2.1.3 : YLR304C<br>4.1.3.7 : YNR001C<br>4.1.3.1 : YPR006C<br>4.1.3.2 : YIR031C<br>1.1.1.37 : YOL126C |
| 19     | 2.82             | 10              | 6              | 4              | 0          | 4.2.1.3 : YLR304C<br>4.1.3.7 : YCR005C<br>4.1.3.1 : YPR006C<br>4.1.3.2 : YNL117W<br>1.1.1.37 : YOL126C |
| 20     | 2.66             | 10              | 5              | 5              | 0          | 4.2.1.3 : YLR304C<br>4.1.3.7 : YNR001C<br>4.1.3.1 : YER065C<br>4.1.3.2 : YIR031C<br>1.1.1.37 : YKL085W |
| 21     | 2.51             | 10              | 5              | 5              | 0          | 4.2.1.3 : YJL200C<br>4.1.3.7 : YNR001C<br>4.1.3.1 : YPR006C<br>4.1.3.2 : YIR031C<br>1.1.1.37 : YDL078C |
| 22     | 2.48             | 10              | 6              | 4              | 0          | 4.2.1.3 : YJL200C<br>4.1.3.7 : YPR001W<br>4.1.3.1 : YER065C<br>4.1.3.2 : YNL117W<br>1.1.1.37 : YKL085W |

**Assignments for the pathway "glyoxylate cycle" (rosetta data set). There are 72 possible assignments of genes to reactions.**

| Number | Normalized Score | Number of Pairs | Positive Pairs | Negative Pairs | Zero Pairs | Assignments                                                                                            |
|--------|------------------|-----------------|----------------|----------------|------------|--------------------------------------------------------------------------------------------------------|
| 23     | 2.48             | 10              | 6              | 4              | 0          | 4.2.1.3 : YJL200C<br>4.1.3.7 : YCR005C<br>4.1.3.1 : YPR006C<br>4.1.3.2 : YIR031C<br>1.1.1.37 : YDL078C |
| 24     | 2.45             | 10              | 4              | 6              | 0          | 4.2.1.3 : YLR304C<br>4.1.3.7 : YCR005C<br>4.1.3.1 : YPR006C<br>4.1.3.2 : YIR031C<br>1.1.1.37 : YKL085W |
| 25     | 2.25             | 10              | 4              | 6              | 0          | 4.2.1.3 : YLR304C<br>4.1.3.7 : YCR005C<br>4.1.3.1 : YPR006C<br>4.1.3.2 : YIR031C<br>1.1.1.37 : YOL126C |
| 26     | 2.24             | 10              | 4              | 6              | 0          | 4.2.1.3 : YJL200C<br>4.1.3.7 : YPR001W<br>4.1.3.1 : YPR006C<br>4.1.3.2 : YNL117W<br>1.1.1.37 : YOL126C |
| 27     | 2.22             | 10              | 8              | 2              | 0          | 4.2.1.3 : YLR304C<br>4.1.3.7 : YCR005C<br>4.1.3.1 : YER065C<br>4.1.3.2 : YNL117W<br>1.1.1.37 : YDL078C |
| 28     | 2.14             | 10              | 7              | 3              | 0          | 4.2.1.3 : YLR304C<br>4.1.3.7 : YPR001W<br>4.1.3.1 : YPR006C<br>4.1.3.2 : YNL117W<br>1.1.1.37 : YDL078C |
| 29     | 2.13             | 10              | 8              | 2              | 0          | 4.2.1.3 : YLR304C<br>4.1.3.7 : YPR001W<br>4.1.3.1 : YER065C<br>4.1.3.2 : YNL117W<br>1.1.1.37 : YDL078C |
| 30     | 2.11             | 10              | 7              | 3              | 0          | 4.2.1.3 : YJL200C<br>4.1.3.7 : YNR001C<br>4.1.3.1 : YER065C<br>4.1.3.2 : YIR031C<br>1.1.1.37 : YDL078C |
| 31     | 2.10             | 10              | 6              | 4              | 0          | 4.2.1.3 : YLR304C<br>4.1.3.7 : YCR005C<br>4.1.3.1 : YER065C<br>4.1.3.2 : YIR031C<br>1.1.1.37 : YDL078C |

**Assignments for the pathway "glyoxylate cycle" (rosetta data set). There are 72 possible assignments of genes to reactions.**

| Number | Normalized Score | Number of Pairs | Positive Pairs | Negative Pairs | Zero Pairs | Assignments                                                                                            |
|--------|------------------|-----------------|----------------|----------------|------------|--------------------------------------------------------------------------------------------------------|
| 32     | 2.08             | 10              | 7              | 3              | 0          | 4.2.1.3 : YJL200C<br>4.1.3.7 : YCR005C<br>4.1.3.1 : YPR006C<br>4.1.3.2 : YNL117W<br>1.1.1.37 : YDL078C |
| 33     | 2.01             | 10              | 6              | 4              | 0          | 4.2.1.3 : YJL200C<br>4.1.3.7 : YPR001W<br>4.1.3.1 : YER065C<br>4.1.3.2 : YIR031C<br>1.1.1.37 : YKL085W |
| 34     | 1.96             | 10              | 4              | 6              | 0          | 4.2.1.3 : YJL200C<br>4.1.3.7 : YPR001W<br>4.1.3.1 : YPR006C<br>4.1.3.2 : YIR031C<br>1.1.1.37 : YOL126C |
| 35     | 1.82             | 10              | 6              | 4              | 0          | 4.2.1.3 : YLR304C<br>4.1.3.7 : YPR001W<br>4.1.3.1 : YPR006C<br>4.1.3.2 : YIR031C<br>1.1.1.37 : YDL078C |
| 36     | 1.80             | 10              | 7              | 3              | 0          | 4.2.1.3 : YLR304C<br>4.1.3.7 : YPR001W<br>4.1.3.1 : YER065C<br>4.1.3.2 : YIR031C<br>1.1.1.37 : YDL078C |
| 37     | 1.76             | 10              | 7              | 3              | 0          | 4.2.1.3 : YJL200C<br>4.1.3.7 : YCR005C<br>4.1.3.1 : YER065C<br>4.1.3.2 : YIR031C<br>1.1.1.37 : YDL078C |
| 38     | 1.73             | 10              | 5              | 5              | 0          | 4.2.1.3 : YJL200C<br>4.1.3.7 : YNR001C<br>4.1.3.1 : YPR006C<br>4.1.3.2 : YNL117W<br>1.1.1.37 : YDL078C |
| 39     | 1.50             | 10              | 5              | 5              | 0          | 4.2.1.3 : YLR304C<br>4.1.3.7 : YNR001C<br>4.1.3.1 : YER065C<br>4.1.3.2 : YNL117W<br>1.1.1.37 : YOL126C |
| 40     | 1.39             | 10              | 8              | 2              | 0          | 4.2.1.3 : YJL200C<br>4.1.3.7 : YCR005C<br>4.1.3.1 : YER065C<br>4.1.3.2 : YNL117W<br>1.1.1.37 : YDL078C |

**Assignments for the pathway "glyoxylate cycle" (rosetta data set). There are 72 possible assignments of genes to reactions.**

| Number | Normalized Score | Number of Pairs | Positive Pairs | Negative Pairs | Zero Pairs | Assignments                                                                                            |
|--------|------------------|-----------------|----------------|----------------|------------|--------------------------------------------------------------------------------------------------------|
| 41     | 1.35             | 10              | 7              | 3              | 0          | 4.2.1.3 : YJL200C<br>4.1.3.7 : YNR001C<br>4.1.3.1 : YER065C<br>4.1.3.2 : YNL117W<br>1.1.1.37 : YDL078C |
| 42     | 1.30             | 10              | 4              | 6              | 0          | 4.2.1.3 : YLR304C<br>4.1.3.7 : YNR001C<br>4.1.3.1 : YER065C<br>4.1.3.2 : YIR031C<br>1.1.1.37 : YOL126C |
| 43     | 1.14             | 10              | 5              | 5              | 0          | 4.2.1.3 : YLR304C<br>4.1.3.7 : YCR005C<br>4.1.3.1 : YER065C<br>4.1.3.2 : YNL117W<br>1.1.1.37 : YKL085W |
| 44     | 1.11             | 10              | 4              | 6              | 0          | 4.2.1.3 : YLR304C<br>4.1.3.7 : YPR001W<br>4.1.3.1 : YER065C<br>4.1.3.2 : YNL117W<br>1.1.1.37 : YOL126C |
| 45     | 1.03             | 10              | 3              | 7              | 0          | 4.2.1.3 : YJL200C<br>4.1.3.7 : YPR001W<br>4.1.3.1 : YPR006C<br>4.1.3.2 : YNL117W<br>1.1.1.37 : YKL085W |
| 46     | 1.02             | 10              | 5              | 5              | 0          | 4.2.1.3 : YLR304C<br>4.1.3.7 : YPR001W<br>4.1.3.1 : YER065C<br>4.1.3.2 : YNL117W<br>1.1.1.37 : YKL085W |
| 47     | 0.98             | 10              | 4              | 6              | 0          | 4.2.1.3 : YLR304C<br>4.1.3.7 : YPR001W<br>4.1.3.1 : YPR006C<br>4.1.3.2 : YNL117W<br>1.1.1.37 : YKL085W |
| 48     | 0.94             | 10              | 4              | 6              | 0          | 4.2.1.3 : YLR304C<br>4.1.3.7 : YPR001W<br>4.1.3.1 : YPR006C<br>4.1.3.2 : YNL117W<br>1.1.1.37 : YOL126C |
| 49     | 0.90             | 10              | 4              | 6              | 0          | 4.2.1.3 : YLR304C<br>4.1.3.7 : YCR005C<br>4.1.3.1 : YER065C<br>4.1.3.2 : YNL117W<br>1.1.1.37 : YOL126C |

**Assignments for the pathway "glyoxylate cycle" (rosetta data set). There are 72 possible assignments of genes to reactions.**

| Number | Normalized Score | Number of Pairs | Positive Pairs | Negative Pairs | Zero Pairs | Assignments                                                                                            |
|--------|------------------|-----------------|----------------|----------------|------------|--------------------------------------------------------------------------------------------------------|
| 50     | 0.71             | 10              | 3              | 7              | 0          | 4.2.1.3 : YJL200C<br>4.1.3.7 : YNR001C<br>4.1.3.1 : YPR006C<br>4.1.3.2 : YIR031C<br>1.1.1.37 : YKL085W |
| 51     | 0.66             | 10              | 5              | 5              | 0          | 4.2.1.3 : YJL200C<br>4.1.3.7 : YCR005C<br>4.1.3.1 : YPR006C<br>4.1.3.2 : YNL117W<br>1.1.1.37 : YOL126C |
| 52     | 0.58             | 10              | 4              | 6              | 0          | 4.2.1.3 : YJL200C<br>4.1.3.7 : YCR005C<br>4.1.3.1 : YPR006C<br>4.1.3.2 : YIR031C<br>1.1.1.37 : YOL126C |
| 53     | 0.58             | 10              | 3              | 7              | 0          | 4.2.1.3 : YJL200C<br>4.1.3.7 : YPR001W<br>4.1.3.1 : YPR006C<br>4.1.3.2 : YIR031C<br>1.1.1.37 : YKL085W |
| 54     | 0.57             | 10              | 3              | 7              | 0          | 4.2.1.3 : YJL200C<br>4.1.3.7 : YNR001C<br>4.1.3.1 : YPR006C<br>4.1.3.2 : YNL117W<br>1.1.1.37 : YKL085W |
| 55     | 0.48             | 10              | 4              | 6              | 0          | 4.2.1.3 : YJL200C<br>4.1.3.7 : YNR001C<br>4.1.3.1 : YPR006C<br>4.1.3.2 : YIR031C<br>1.1.1.37 : YOL126C |
| 56     | 0.39             | 10              | 3              | 7              | 0          | 4.2.1.3 : YLR304C<br>4.1.3.7 : YCR005C<br>4.1.3.1 : YER065C<br>4.1.3.2 : YIR031C<br>1.1.1.37 : YKL085W |
| 57     | 0.37             | 10              | 5              | 5              | 0          | 4.2.1.3 : YJL200C<br>4.1.3.7 : YNR001C<br>4.1.3.1 : YER065C<br>4.1.3.2 : YIR031C<br>1.1.1.37 : YKL085W |
| 58     | 0.32             | 10              | 2              | 8              | 0          | 4.2.1.3 : YLR304C<br>4.1.3.7 : YCR005C<br>4.1.3.1 : YER065C<br>4.1.3.2 : YIR031C<br>1.1.1.37 : YOL126C |

**Assignments for the pathway "glyoxylate cycle" (rosetta data set). There are 72 possible assignments of genes to reactions.**



| Number | Normalized Score | Number of Pairs | Positive Pairs | Negative Pairs | Zero Pairs | Assignments                                                                                            |
|--------|------------------|-----------------|----------------|----------------|------------|--------------------------------------------------------------------------------------------------------|
| 59     | 0.31             | 10              | 3              | 7              | 0          | 4.2.1.3 : YLR304C<br>4.1.3.7 : YPR001W<br>4.1.3.1 : YER065C<br>4.1.3.2 : YIR031C<br>1.1.1.37 : YOL126C |
| 60     | 0.26             | 10              | 5              | 5              | 0          | 4.2.1.3 : YJL200C<br>4.1.3.7 : YNR001C<br>4.1.3.1 : YER065C<br>4.1.3.2 : YIR031C<br>1.1.1.37 : YOL126C |
| 61     | 0.24             | 10              | 5              | 5              | 0          | 4.2.1.3 : YJL200C<br>4.1.3.7 : YNR001C<br>4.1.3.1 : YER065C<br>4.1.3.2 : YNL117W<br>1.1.1.37 : YKL085W |
| 62     | 0.17             | 10              | 4              | 6              | 0          | 4.2.1.3 : YJL200C<br>4.1.3.7 : YNR001C<br>4.1.3.1 : YPR006C<br>4.1.3.2 : YNL117W<br>1.1.1.37 : YOL126C |
| 63     | 0.16             | 10              | 3              | 7              | 0          | 4.2.1.3 : YLR304C<br>4.1.3.7 : YPR001W<br>4.1.3.1 : YPR006C<br>4.1.3.2 : YIR031C<br>1.1.1.37 : YOL126C |
| 64     | 0.14             | 10              | 5              | 5              | 0          | 4.2.1.3 : YJL200C<br>4.1.3.7 : YCR005C<br>4.1.3.1 : YER065C<br>4.1.3.2 : YNL117W<br>1.1.1.37 : YOL126C |
| 65     | 0.06             | 10              | 4              | 6              | 0          | 4.2.1.3 : YLR304C<br>4.1.3.7 : YPR001W<br>4.1.3.1 : YER065C<br>4.1.3.2 : YIR031C<br>1.1.1.37 : YKL085W |
| 66     | 0.05             | 10              | 4              | 6              | 0          | 4.2.1.3 : YJL200C<br>4.1.3.7 : YCR005C<br>4.1.3.1 : YER065C<br>4.1.3.2 : YIR031C<br>1.1.1.37 : YOL126C |
| 67     | 0.03             | 10              | 3              | 7              | 0          | 4.2.1.3 : YLR304C<br>4.1.3.7 : YPR001W<br>4.1.3.1 : YPR006C<br>4.1.3.2 : YIR031C<br>1.1.1.37 : YKL085W |

**Assignments for the pathway "glyoxylate cycle" (rosetta data set). There are 72 possible assignments of genes to reactions.**

| Number | Normalized Score | Number of Pairs | Positive Pairs | Negative Pairs | Zero Pairs | Assignments                                                                                            |
|--------|------------------|-----------------|----------------|----------------|------------|--------------------------------------------------------------------------------------------------------|
| 68     | -0.03            | 10              | 5              | 5              | 0          | 4.2.1.3 : YJL200C<br>4.1.3.7 : YNR001C<br>4.1.3.1 : YER065C<br>4.1.3.2 : YNL117W<br>1.1.1.37 : YOL126C |
| 69     | -0.23            | 10              | 4              | 6              | 0          | 4.2.1.3 : YJL200C<br>4.1.3.7 : YCR005C<br>4.1.3.1 : YPR006C<br>4.1.3.2 : YNL117W<br>1.1.1.37 : YKL085W |
| 70     | -0.47            | 10              | 3              | 7              | 0          | 4.2.1.3 : YJL200C<br>4.1.3.7 : YCR005C<br>4.1.3.1 : YPR006C<br>4.1.3.2 : YIR031C<br>1.1.1.37 : YKL085W |
| 71     | -0.87            | 10              | 5              | 5              | 0          | 4.2.1.3 : YJL200C<br>4.1.3.7 : YCR005C<br>4.1.3.1 : YER065C<br>4.1.3.2 : YNL117W<br>1.1.1.37 : YKL085W |
| 72     | -1.13            | 10              | 4              | 6              | 0          | 4.2.1.3 : YJL200C<br>4.1.3.7 : YCR005C<br>4.1.3.1 : YER065C<br>4.1.3.2 : YIR031C<br>1.1.1.37 : YKL085W |

**Table 4: Assignments for the pathway "glyoxylate cycle" (rosetta data set). There are 72 possible assignments of genes to reactions.**

| Number | Normalized Score | Number of Pairs | Positive Pairs | Negative Pairs | Zero Pairs | Assignments                                                                                                                                                                                                                              |
|--------|------------------|-----------------|----------------|----------------|------------|------------------------------------------------------------------------------------------------------------------------------------------------------------------------------------------------------------------------------------------|
| 1      | 6.57             | 55              | 36             | 19             | 0          | 6.3.4.3 : YBR084W<br>6.3.2.17 : YKL132C<br>3.5.4.16 : YGR267C<br>4.1.2.25 : YNL256W<br>2.7.6.3 : YNL256W<br>1.5.1.3 : YOR236W<br>6.3.2.12 : YMR113W<br>2.1.2.1 : YLR058C<br>3.5.4.9 : YBR084W<br>1.5.1.5 : YBR084W<br>2.5.1.15 : YNL256W |

**Assignments for the pathway "folic acid biosynthesis" (rosetta data set). There are 48 possible assignments of genes to reactions.**

| Number | Normalized Score | Number of Pairs | Positive Pairs | Negative Pairs | Zero Pairs | Assignments                                                                                                                                                                                                                              |
|--------|------------------|-----------------|----------------|----------------|------------|------------------------------------------------------------------------------------------------------------------------------------------------------------------------------------------------------------------------------------------|
| 2      | 6.24             | 55              | 36             | 19             | 0          | 6.3.4.3 : YBR084W<br>6.3.2.17 : YKL132C<br>3.5.4.16 : YGR267C<br>4.1.2.25 : YNL256W<br>2.7.6.3 : YNL256W<br>1.5.1.3 : YOR236W<br>6.3.2.12 : YMR113W<br>2.1.2.1 : YBR263W<br>3.5.4.9 : YBR084W<br>1.5.1.5 : YBR084W<br>2.5.1.15 : YNL256W |
| 3      | 5.72             | 55              | 33             | 22             | 0          | 6.3.4.3 : YBR084W<br>6.3.2.17 : YOR241W<br>3.5.4.16 : YGR267C<br>4.1.2.25 : YNL256W<br>2.7.6.3 : YNL256W<br>1.5.1.3 : YOR236W<br>6.3.2.12 : YMR113W<br>2.1.2.1 : YLR058C<br>3.5.4.9 : YBR084W<br>1.5.1.5 : YBR084W<br>2.5.1.15 : YNL256W |
| 4      | 5.39             | 55              | 34             | 21             | 0          | 6.3.4.3 : YBR084W<br>6.3.2.17 : YOR241W<br>3.5.4.16 : YGR267C<br>4.1.2.25 : YNL256W<br>2.7.6.3 : YNL256W<br>1.5.1.3 : YOR236W<br>6.3.2.12 : YMR113W<br>2.1.2.1 : YBR263W<br>3.5.4.9 : YBR084W<br>1.5.1.5 : YBR084W<br>2.5.1.15 : YNL256W |
| 5      | 5.32             | 55              | 35             | 20             | 0          | 6.3.4.3 : YBR084W<br>6.3.2.17 : YMR113W<br>3.5.4.16 : YGR267C<br>4.1.2.25 : YNL256W<br>2.7.6.3 : YNL256W<br>1.5.1.3 : YOR236W<br>6.3.2.12 : YMR113W<br>2.1.2.1 : YLR058C<br>3.5.4.9 : YBR084W<br>1.5.1.5 : YBR084W<br>2.5.1.15 : YNL256W |

Assignments for the pathway "folic acid biosynthesis" (rosetta data set). There are 48 possible assignments of genes to reactions.

| Number | Normalized Score | Number of Pairs | Positive Pairs | Negative Pairs | Zero Pairs | Assignments                                                                                                                                                                                                                              |
|--------|------------------|-----------------|----------------|----------------|------------|------------------------------------------------------------------------------------------------------------------------------------------------------------------------------------------------------------------------------------------|
| 6      | 4.89             | 55              | 35             | 20             | 0          | 6.3.4.3 : YBR084W<br>6.3.2.17 : YMR113W<br>3.5.4.16 : YGR267C<br>4.1.2.25 : YNL256W<br>2.7.6.3 : YNL256W<br>1.5.1.3 : YOR236W<br>6.3.2.12 : YMR113W<br>2.1.2.1 : YBR263W<br>3.5.4.9 : YBR084W<br>1.5.1.5 : YBR084W<br>2.5.1.15 : YNL256W |
| 7      | 4.37             | 55              | 32             | 23             | 0          | 6.3.4.3 : YBR084W<br>6.3.2.17 : YKL132C<br>3.5.4.16 : YGR267C<br>4.1.2.25 : YNL256W<br>2.7.6.3 : YNL256W<br>1.5.1.3 : YOR236W<br>6.3.2.12 : YMR113W<br>2.1.2.1 : YLR058C<br>3.5.4.9 : YGR204W<br>1.5.1.5 : YBR084W<br>2.5.1.15 : YNL256W |
| 8      | 4.37             | 55              | 32             | 23             | 0          | 6.3.4.3 : YGR204W<br>6.3.2.17 : YKL132C<br>3.5.4.16 : YGR267C<br>4.1.2.25 : YNL256W<br>2.7.6.3 : YNL256W<br>1.5.1.3 : YOR236W<br>6.3.2.12 : YMR113W<br>2.1.2.1 : YLR058C<br>3.5.4.9 : YBR084W<br>1.5.1.5 : YBR084W<br>2.5.1.15 : YNL256W |
| 9      | 4.37             | 55              | 32             | 23             | 0          | 6.3.4.3 : YBR084W<br>6.3.2.17 : YKL132C<br>3.5.4.16 : YGR267C<br>4.1.2.25 : YNL256W<br>2.7.6.3 : YNL256W<br>1.5.1.3 : YOR236W<br>6.3.2.12 : YMR113W<br>2.1.2.1 : YLR058C<br>3.5.4.9 : YBR084W<br>1.5.1.5 : YGR204W<br>2.5.1.15 : YNL256W |

Assignments for the pathway "folic acid biosynthesis" (rosetta data set). There are 48 possible assignments of genes to reactions.

| Number | Normalized Score | Number of Pairs | Positive Pairs | Negative Pairs | Zero Pairs | Assignments                                                                                                                                                                                                                              |
|--------|------------------|-----------------|----------------|----------------|------------|------------------------------------------------------------------------------------------------------------------------------------------------------------------------------------------------------------------------------------------|
| 10     | 3.89             | 55              | 31             | 24             | 0          | 6.3.4.3 : YBR084W<br>6.3.2.17 : YKL132C<br>3.5.4.16 : YGR267C<br>4.1.2.25 : YNL256W<br>2.7.6.3 : YNL256W<br>1.5.1.3 : YOR236W<br>6.3.2.12 : YMR113W<br>2.1.2.1 : YBR263W<br>3.5.4.9 : YGR204W<br>1.5.1.5 : YBR084W<br>2.5.1.15 : YNL256W |
| 11     | 3.89             | 55              | 31             | 24             | 0          | 6.3.4.3 : YBR084W<br>6.3.2.17 : YKL132C<br>3.5.4.16 : YGR267C<br>4.1.2.25 : YNL256W<br>2.7.6.3 : YNL256W<br>1.5.1.3 : YOR236W<br>6.3.2.12 : YMR113W<br>2.1.2.1 : YBR263W<br>3.5.4.9 : YBR084W<br>1.5.1.5 : YGR204W<br>2.5.1.15 : YNL256W |
| 12     | 3.89             | 55              | 31             | 24             | 0          | 6.3.4.3 : YGR204W<br>6.3.2.17 : YKL132C<br>3.5.4.16 : YGR267C<br>4.1.2.25 : YNL256W<br>2.7.6.3 : YNL256W<br>1.5.1.3 : YOR236W<br>6.3.2.12 : YMR113W<br>2.1.2.1 : YBR263W<br>3.5.4.9 : YBR084W<br>1.5.1.5 : YBR084W<br>2.5.1.15 : YNL256W |
| 13     | 3.55             | 55              | 29             | 26             | 0          | 6.3.4.3 : YBR084W<br>6.3.2.17 : YOR241W<br>3.5.4.16 : YGR267C<br>4.1.2.25 : YNL256W<br>2.7.6.3 : YNL256W<br>1.5.1.3 : YOR236W<br>6.3.2.12 : YMR113W<br>2.1.2.1 : YLR058C<br>3.5.4.9 : YGR204W<br>1.5.1.5 : YBR084W<br>2.5.1.15 : YNL256W |

Assignments for the pathway "folic acid biosynthesis" (rosetta data set). There are 48 possible assignments of genes to reactions.

| Number | Normalized Score | Number of Pairs | Positive Pairs | Negative Pairs | Zero Pairs | Assignments                                                                                                                                                                                                                              |
|--------|------------------|-----------------|----------------|----------------|------------|------------------------------------------------------------------------------------------------------------------------------------------------------------------------------------------------------------------------------------------|
| 14     | 3.55             | 55              | 29             | 26             | 0          | 6.3.4.3 : YGR204W<br>6.3.2.17 : YOR241W<br>3.5.4.16 : YGR267C<br>4.1.2.25 : YNL256W<br>2.7.6.3 : YNL256W<br>1.5.1.3 : YOR236W<br>6.3.2.12 : YMR113W<br>2.1.2.1 : YLR058C<br>3.5.4.9 : YBR084W<br>1.5.1.5 : YBR084W<br>2.5.1.15 : YNL256W |
| 15     | 3.55             | 55              | 29             | 26             | 0          | 6.3.4.3 : YBR084W<br>6.3.2.17 : YOR241W<br>3.5.4.16 : YGR267C<br>4.1.2.25 : YNL256W<br>2.7.6.3 : YNL256W<br>1.5.1.3 : YOR236W<br>6.3.2.12 : YMR113W<br>2.1.2.1 : YLR058C<br>3.5.4.9 : YBR084W<br>1.5.1.5 : YGR204W<br>2.5.1.15 : YNL256W |
| 16     | 3.46             | 55              | 31             | 24             | 0          | 6.3.4.3 : YBR084W<br>6.3.2.17 : YMR113W<br>3.5.4.16 : YGR267C<br>4.1.2.25 : YNL256W<br>2.7.6.3 : YNL256W<br>1.5.1.3 : YOR236W<br>6.3.2.12 : YMR113W<br>2.1.2.1 : YLR058C<br>3.5.4.9 : YGR204W<br>1.5.1.5 : YBR084W<br>2.5.1.15 : YNL256W |
| 17     | 3.46             | 55              | 31             | 24             | 0          | 6.3.4.3 : YGR204W<br>6.3.2.17 : YMR113W<br>3.5.4.16 : YGR267C<br>4.1.2.25 : YNL256W<br>2.7.6.3 : YNL256W<br>1.5.1.3 : YOR236W<br>6.3.2.12 : YMR113W<br>2.1.2.1 : YLR058C<br>3.5.4.9 : YBR084W<br>1.5.1.5 : YBR084W<br>2.5.1.15 : YNL256W |

Assignments for the pathway "folic acid biosynthesis" (rosetta data set). There are 48 possible assignments of genes to reactions.

| Number | Normalized Score | Number of Pairs | Positive Pairs | Negative Pairs | Zero Pairs | Assignments                                                                                                                                                                                                                              |
|--------|------------------|-----------------|----------------|----------------|------------|------------------------------------------------------------------------------------------------------------------------------------------------------------------------------------------------------------------------------------------|
| 18     | 3.46             | 55              | 31             | 24             | 0          | 6.3.4.3 : YBR084W<br>6.3.2.17 : YMR113W<br>3.5.4.16 : YGR267C<br>4.1.2.25 : YNL256W<br>2.7.6.3 : YNL256W<br>1.5.1.3 : YOR236W<br>6.3.2.12 : YMR113W<br>2.1.2.1 : YLR058C<br>3.5.4.9 : YBR084W<br>1.5.1.5 : YGR204W<br>2.5.1.15 : YNL256W |
| 19     | 3.23             | 55              | 30             | 25             | 0          | 6.3.4.3 : YGR204W<br>6.3.2.17 : YKL132C<br>3.5.4.16 : YGR267C<br>4.1.2.25 : YNL256W<br>2.7.6.3 : YNL256W<br>1.5.1.3 : YOR236W<br>6.3.2.12 : YMR113W<br>2.1.2.1 : YLR058C<br>3.5.4.9 : YGR204W<br>1.5.1.5 : YBR084W<br>2.5.1.15 : YNL256W |
| 20     | 3.23             | 55              | 30             | 25             | 0          | 6.3.4.3 : YGR204W<br>6.3.2.17 : YKL132C<br>3.5.4.16 : YGR267C<br>4.1.2.25 : YNL256W<br>2.7.6.3 : YNL256W<br>1.5.1.3 : YOR236W<br>6.3.2.12 : YMR113W<br>2.1.2.1 : YLR058C<br>3.5.4.9 : YBR084W<br>1.5.1.5 : YGR204W<br>2.5.1.15 : YNL256W |
| 21     | 3.23             | 55              | 30             | 25             | 0          | 6.3.4.3 : YBR084W<br>6.3.2.17 : YKL132C<br>3.5.4.16 : YGR267C<br>4.1.2.25 : YNL256W<br>2.7.6.3 : YNL256W<br>1.5.1.3 : YOR236W<br>6.3.2.12 : YMR113W<br>2.1.2.1 : YLR058C<br>3.5.4.9 : YGR204W<br>1.5.1.5 : YGR204W<br>2.5.1.15 : YNL256W |

Assignments for the pathway "folic acid biosynthesis" (rosetta data set). There are 48 possible assignments of genes to reactions.

| Number | Normalized Score | Number of Pairs | Positive Pairs | Negative Pairs | Zero Pairs | Assignments                                                                                                                                                                                                                              |
|--------|------------------|-----------------|----------------|----------------|------------|------------------------------------------------------------------------------------------------------------------------------------------------------------------------------------------------------------------------------------------|
| 22     | 3.17             | 55              | 30             | 25             | 0          | 6.3.4.3 : YGR204W<br>6.3.2.17 : YKL132C<br>3.5.4.16 : YGR267C<br>4.1.2.25 : YNL256W<br>2.7.6.3 : YNL256W<br>1.5.1.3 : YOR236W<br>6.3.2.12 : YMR113W<br>2.1.2.1 : YLR058C<br>3.5.4.9 : YGR204W<br>1.5.1.5 : YGR204W<br>2.5.1.15 : YNL256W |
| 23     | 3.07             | 55              | 29             | 26             | 0          | 6.3.4.3 : YGR204W<br>6.3.2.17 : YOR241W<br>3.5.4.16 : YGR267C<br>4.1.2.25 : YNL256W<br>2.7.6.3 : YNL256W<br>1.5.1.3 : YOR236W<br>6.3.2.12 : YMR113W<br>2.1.2.1 : YBR263W<br>3.5.4.9 : YBR084W<br>1.5.1.5 : YBR084W<br>2.5.1.15 : YNL256W |
| 24     | 3.07             | 55              | 29             | 26             | 0          | 6.3.4.3 : YBR084W<br>6.3.2.17 : YOR241W<br>3.5.4.16 : YGR267C<br>4.1.2.25 : YNL256W<br>2.7.6.3 : YNL256W<br>1.5.1.3 : YOR236W<br>6.3.2.12 : YMR113W<br>2.1.2.1 : YBR263W<br>3.5.4.9 : YGR204W<br>1.5.1.5 : YBR084W<br>2.5.1.15 : YNL256W |
| 25     | 3.07             | 55              | 29             | 26             | 0          | 6.3.4.3 : YBR084W<br>6.3.2.17 : YOR241W<br>3.5.4.16 : YGR267C<br>4.1.2.25 : YNL256W<br>2.7.6.3 : YNL256W<br>1.5.1.3 : YOR236W<br>6.3.2.12 : YMR113W<br>2.1.2.1 : YBR263W<br>3.5.4.9 : YBR084W<br>1.5.1.5 : YGR204W<br>2.5.1.15 : YNL256W |

Assignments for the pathway "folic acid biosynthesis" (rosetta data set). There are 48 possible assignments of genes to reactions.



| Number | Normalized Score | Number of Pairs | Positive Pairs | Negative Pairs | Zero Pairs | Assignments                                                                                                                                                                                                                              |
|--------|------------------|-----------------|----------------|----------------|------------|------------------------------------------------------------------------------------------------------------------------------------------------------------------------------------------------------------------------------------------|
| 26     | 2.97             | 55              | 29             | 26             | 0          | 6.3.4.3 : YGR204W<br>6.3.2.17 : YMR113W<br>3.5.4.16 : YGR267C<br>4.1.2.25 : YNL256W<br>2.7.6.3 : YNL256W<br>1.5.1.3 : YOR236W<br>6.3.2.12 : YMR113W<br>2.1.2.1 : YLR058C<br>3.5.4.9 : YGR204W<br>1.5.1.5 : YGR204W<br>2.5.1.15 : YNL256W |
| 27     | 2.89             | 55              | 30             | 25             | 0          | 6.3.4.3 : YBR084W<br>6.3.2.17 : YMR113W<br>3.5.4.16 : YGR267C<br>4.1.2.25 : YNL256W<br>2.7.6.3 : YNL256W<br>1.5.1.3 : YOR236W<br>6.3.2.12 : YMR113W<br>2.1.2.1 : YBR263W<br>3.5.4.9 : YBR084W<br>1.5.1.5 : YGR204W<br>2.5.1.15 : YNL256W |
| 28     | 2.89             | 55              | 30             | 25             | 0          | 6.3.4.3 : YGR204W<br>6.3.2.17 : YMR113W<br>3.5.4.16 : YGR267C<br>4.1.2.25 : YNL256W<br>2.7.6.3 : YNL256W<br>1.5.1.3 : YOR236W<br>6.3.2.12 : YMR113W<br>2.1.2.1 : YBR263W<br>3.5.4.9 : YBR084W<br>1.5.1.5 : YBR084W<br>2.5.1.15 : YNL256W |
| 29     | 2.89             | 55              | 30             | 25             | 0          | 6.3.4.3 : YBR084W<br>6.3.2.17 : YMR113W<br>3.5.4.16 : YGR267C<br>4.1.2.25 : YNL256W<br>2.7.6.3 : YNL256W<br>1.5.1.3 : YOR236W<br>6.3.2.12 : YMR113W<br>2.1.2.1 : YBR263W<br>3.5.4.9 : YGR204W<br>1.5.1.5 : YBR084W<br>2.5.1.15 : YNL256W |

Assignments for the pathway "folic acid biosynthesis" (rosetta data set). There are 48 possible assignments of genes to reactions.

| Number | Normalized Score | Number of Pairs | Positive Pairs | Negative Pairs | Zero Pairs | Assignments                                                                                                                                                                                                                              |
|--------|------------------|-----------------|----------------|----------------|------------|------------------------------------------------------------------------------------------------------------------------------------------------------------------------------------------------------------------------------------------|
| 30     | 2.68             | 55              | 29             | 26             | 0          | 6.3.4.3 : YGR204W<br>6.3.2.17 : YMR113W<br>3.5.4.16 : YGR267C<br>4.1.2.25 : YNL256W<br>2.7.6.3 : YNL256W<br>1.5.1.3 : YOR236W<br>6.3.2.12 : YMR113W<br>2.1.2.1 : YLR058C<br>3.5.4.9 : YGR204W<br>1.5.1.5 : YBR084W<br>2.5.1.15 : YNL256W |
| 31     | 2.68             | 55              | 29             | 26             | 0          | 6.3.4.3 : YGR204W<br>6.3.2.17 : YMR113W<br>3.5.4.16 : YGR267C<br>4.1.2.25 : YNL256W<br>2.7.6.3 : YNL256W<br>1.5.1.3 : YOR236W<br>6.3.2.12 : YMR113W<br>2.1.2.1 : YLR058C<br>3.5.4.9 : YBR084W<br>1.5.1.5 : YGR204W<br>2.5.1.15 : YNL256W |
| 32     | 2.68             | 55              | 29             | 26             | 0          | 6.3.4.3 : YBR084W<br>6.3.2.17 : YMR113W<br>3.5.4.16 : YGR267C<br>4.1.2.25 : YNL256W<br>2.7.6.3 : YNL256W<br>1.5.1.3 : YOR236W<br>6.3.2.12 : YMR113W<br>2.1.2.1 : YLR058C<br>3.5.4.9 : YGR204W<br>1.5.1.5 : YGR204W<br>2.5.1.15 : YNL256W |
| 33     | 2.62             | 55              | 28             | 27             | 0          | 6.3.4.3 : YGR204W<br>6.3.2.17 : YKL132C<br>3.5.4.16 : YGR267C<br>4.1.2.25 : YNL256W<br>2.7.6.3 : YNL256W<br>1.5.1.3 : YOR236W<br>6.3.2.12 : YMR113W<br>2.1.2.1 : YBR263W<br>3.5.4.9 : YBR084W<br>1.5.1.5 : YGR204W<br>2.5.1.15 : YNL256W |

Assignments for the pathway "folic acid biosynthesis" (rosetta data set). There are 48 possible assignments of genes to reactions.

| Number | Normalized Score | Number of Pairs | Positive Pairs | Negative Pairs | Zero Pairs | Assignments                                                                                                                                                                                                                              |
|--------|------------------|-----------------|----------------|----------------|------------|------------------------------------------------------------------------------------------------------------------------------------------------------------------------------------------------------------------------------------------|
| 34     | 2.62             | 55              | 28             | 27             | 0          | 6.3.4.3 : YGR204W<br>6.3.2.17 : YKL132C<br>3.5.4.16 : YGR267C<br>4.1.2.25 : YNL256W<br>2.7.6.3 : YNL256W<br>1.5.1.3 : YOR236W<br>6.3.2.12 : YMR113W<br>2.1.2.1 : YBR263W<br>3.5.4.9 : YGR204W<br>1.5.1.5 : YBR084W<br>2.5.1.15 : YNL256W |
| 35     | 2.62             | 55              | 28             | 27             | 0          | 6.3.4.3 : YBR084W<br>6.3.2.17 : YKL132C<br>3.5.4.16 : YGR267C<br>4.1.2.25 : YNL256W<br>2.7.6.3 : YNL256W<br>1.5.1.3 : YOR236W<br>6.3.2.12 : YMR113W<br>2.1.2.1 : YBR263W<br>3.5.4.9 : YGR204W<br>1.5.1.5 : YGR204W<br>2.5.1.15 : YNL256W |
| 36     | 2.44             | 55              | 27             | 28             | 0          | 6.3.4.3 : YGR204W<br>6.3.2.17 : YOR241W<br>3.5.4.16 : YGR267C<br>4.1.2.25 : YNL256W<br>2.7.6.3 : YNL256W<br>1.5.1.3 : YOR236W<br>6.3.2.12 : YMR113W<br>2.1.2.1 : YLR058C<br>3.5.4.9 : YBR084W<br>1.5.1.5 : YGR204W<br>2.5.1.15 : YNL256W |
| 37     | 2.44             | 55              | 27             | 28             | 0          | 6.3.4.3 : YBR084W<br>6.3.2.17 : YOR241W<br>3.5.4.16 : YGR267C<br>4.1.2.25 : YNL256W<br>2.7.6.3 : YNL256W<br>1.5.1.3 : YOR236W<br>6.3.2.12 : YMR113W<br>2.1.2.1 : YLR058C<br>3.5.4.9 : YGR204W<br>1.5.1.5 : YGR204W<br>2.5.1.15 : YNL256W |

Assignments for the pathway "folic acid biosynthesis" (rosetta data set). There are 48 possible assignments of genes to reactions.

| Number | Normalized Score | Number of Pairs | Positive Pairs | Negative Pairs | Zero Pairs | Assignments                                                                                                                                                                                                                              |
|--------|------------------|-----------------|----------------|----------------|------------|------------------------------------------------------------------------------------------------------------------------------------------------------------------------------------------------------------------------------------------|
| 38     | 2.44             | 55              | 27             | 28             | 0          | 6.3.4.3 : YGR204W<br>6.3.2.17 : YOR241W<br>3.5.4.16 : YGR267C<br>4.1.2.25 : YNL256W<br>2.7.6.3 : YNL256W<br>1.5.1.3 : YOR236W<br>6.3.2.12 : YMR113W<br>2.1.2.1 : YLR058C<br>3.5.4.9 : YGR204W<br>1.5.1.5 : YBR084W<br>2.5.1.15 : YNL256W |
| 39     | 2.41             | 55              | 27             | 28             | 0          | 6.3.4.3 : YGR204W<br>6.3.2.17 : YKL132C<br>3.5.4.16 : YGR267C<br>4.1.2.25 : YNL256W<br>2.7.6.3 : YNL256W<br>1.5.1.3 : YOR236W<br>6.3.2.12 : YMR113W<br>2.1.2.1 : YBR263W<br>3.5.4.9 : YGR204W<br>1.5.1.5 : YGR204W<br>2.5.1.15 : YNL256W |
| 40     | 2.41             | 55              | 27             | 28             | 0          | 6.3.4.3 : YGR204W<br>6.3.2.17 : YOR241W<br>3.5.4.16 : YGR267C<br>4.1.2.25 : YNL256W<br>2.7.6.3 : YNL256W<br>1.5.1.3 : YOR236W<br>6.3.2.12 : YMR113W<br>2.1.2.1 : YLR058C<br>3.5.4.9 : YGR204W<br>1.5.1.5 : YGR204W<br>2.5.1.15 : YNL256W |
| 41     | 2.11             | 55              | 26             | 29             | 0          | 6.3.4.3 : YGR204W<br>6.3.2.17 : YMR113W<br>3.5.4.16 : YGR267C<br>4.1.2.25 : YNL256W<br>2.7.6.3 : YNL256W<br>1.5.1.3 : YOR236W<br>6.3.2.12 : YMR113W<br>2.1.2.1 : YBR263W<br>3.5.4.9 : YGR204W<br>1.5.1.5 : YGR204W<br>2.5.1.15 : YNL256W |

Assignments for the pathway "folic acid biosynthesis" (rosetta data set). There are 48 possible assignments of genes to reactions.

| Number | Normalized Score | Number of Pairs | Positive Pairs | Negative Pairs | Zero Pairs | Assignments                                                                                                                                                                                                                              |
|--------|------------------|-----------------|----------------|----------------|------------|------------------------------------------------------------------------------------------------------------------------------------------------------------------------------------------------------------------------------------------|
| 42     | 1.96             | 55              | 27             | 28             | 0          | 6.3.4.3 : YGR204W<br>6.3.2.17 : YMR113W<br>3.5.4.16 : YGR267C<br>4.1.2.25 : YNL256W<br>2.7.6.3 : YNL256W<br>1.5.1.3 : YOR236W<br>6.3.2.12 : YMR113W<br>2.1.2.1 : YBR263W<br>3.5.4.9 : YGR204W<br>1.5.1.5 : YBR084W<br>2.5.1.15 : YNL256W |
| 43     | 1.96             | 55              | 27             | 28             | 0          | 6.3.4.3 : YGR204W<br>6.3.2.17 : YMR113W<br>3.5.4.16 : YGR267C<br>4.1.2.25 : YNL256W<br>2.7.6.3 : YNL256W<br>1.5.1.3 : YOR236W<br>6.3.2.12 : YMR113W<br>2.1.2.1 : YBR263W<br>3.5.4.9 : YBR084W<br>1.5.1.5 : YGR204W<br>2.5.1.15 : YNL256W |
| 44     | 1.96             | 55              | 27             | 28             | 0          | 6.3.4.3 : YBR084W<br>6.3.2.17 : YMR113W<br>3.5.4.16 : YGR267C<br>4.1.2.25 : YNL256W<br>2.7.6.3 : YNL256W<br>1.5.1.3 : YOR236W<br>6.3.2.12 : YMR113W<br>2.1.2.1 : YBR263W<br>3.5.4.9 : YGR204W<br>1.5.1.5 : YGR204W<br>2.5.1.15 : YNL256W |
| 45     | 1.83             | 55              | 26             | 29             | 0          | 6.3.4.3 : YGR204W<br>6.3.2.17 : YOR241W<br>3.5.4.16 : YGR267C<br>4.1.2.25 : YNL256W<br>2.7.6.3 : YNL256W<br>1.5.1.3 : YOR236W<br>6.3.2.12 : YMR113W<br>2.1.2.1 : YBR263W<br>3.5.4.9 : YGR204W<br>1.5.1.5 : YBR084W<br>2.5.1.15 : YNL256W |

Assignments for the pathway "folic acid biosynthesis" (rosetta data set). There are 48 possible assignments of genes to reactions.

| Number | Normalized Score | Number of Pairs | Positive Pairs | Negative Pairs | Zero Pairs | Assignments                                                                                                                                                                                                                              |
|--------|------------------|-----------------|----------------|----------------|------------|------------------------------------------------------------------------------------------------------------------------------------------------------------------------------------------------------------------------------------------|
| 46     | 1.83             | 55              | 26             | 29             | 0          | 6.3.4.3 : YGR204W<br>6.3.2.17 : YOR241W<br>3.5.4.16 : YGR267C<br>4.1.2.25 : YNL256W<br>2.7.6.3 : YNL256W<br>1.5.1.3 : YOR236W<br>6.3.2.12 : YMR113W<br>2.1.2.1 : YBR263W<br>3.5.4.9 : YBR084W<br>1.5.1.5 : YGR204W<br>2.5.1.15 : YNL256W |
| 47     | 1.83             | 55              | 26             | 29             | 0          | 6.3.4.3 : YBR084W<br>6.3.2.17 : YOR241W<br>3.5.4.16 : YGR267C<br>4.1.2.25 : YNL256W<br>2.7.6.3 : YNL256W<br>1.5.1.3 : YOR236W<br>6.3.2.12 : YMR113W<br>2.1.2.1 : YBR263W<br>3.5.4.9 : YGR204W<br>1.5.1.5 : YGR204W<br>2.5.1.15 : YNL256W |
| 48     | 1.66             | 55              | 25             | 30             | 0          | 6.3.4.3 : YGR204W<br>6.3.2.17 : YOR241W<br>3.5.4.16 : YGR267C<br>4.1.2.25 : YNL256W<br>2.7.6.3 : YNL256W<br>1.5.1.3 : YOR236W<br>6.3.2.12 : YMR113W<br>2.1.2.1 : YBR263W<br>3.5.4.9 : YGR204W<br>1.5.1.5 : YGR204W<br>2.5.1.15 : YNL256W |

Table 5: Assignments for the pathway "folic acid biosynthesis" (rosetta data set). There are 48 possible assignments of genes to reactions.

| Number | Normalized Score | Number of Pairs | Positive Pairs | Negative Pairs | Zero Pairs | Assignments                                                                                                                                                                                                                                                                                              |
|--------|------------------|-----------------|----------------|----------------|------------|----------------------------------------------------------------------------------------------------------------------------------------------------------------------------------------------------------------------------------------------------------------------------------------------------------|
| 1      | 18.24            | 77              | 73             | 4              | 14         | 6.3.5.2 : YMR217W<br>1.1.1.205 : 4401<br>4.3.2.2 : YLR359W<br>6.3.4.4 : YNL220W<br>3.5.4.10 : YMR120C<br>2.1.2.3 : YMR120C<br>4.3.2.2 : YLR359W<br>6.3.2.6 : YAR015W<br>4.1.1.21 : YOR128C<br>6.3.3.1 : YGL234W<br>6.3.5.3 : YGR061C<br>2.1.2.2 : YDR408C<br>6.3.4.13 : YGL234W<br>2.4.2.14 : YMR300C    |
| 2      | 15.89            | 90              | 80             | 10             | 1          | 6.3.5.2 : YMR217W<br>1.1.1.205 : YAR073W<br>4.3.2.2 : YLR359W<br>6.3.4.4 : YNL220W<br>3.5.4.10 : YMR120C<br>2.1.2.3 : YMR120C<br>4.3.2.2 : YLR359W<br>6.3.2.6 : YAR015W<br>4.1.1.21 : YOR128C<br>6.3.3.1 : YGL234W<br>6.3.5.3 : YGR061C<br>2.1.2.2 : YDR408C<br>6.3.4.13 : YGL234W<br>2.4.2.14 : YMR300C |
| 3      | 15.88            | 90              | 79             | 11             | 1          | 6.3.5.2 : YMR217W<br>1.1.1.205 : YHR216W<br>4.3.2.2 : YLR359W<br>6.3.4.4 : YNL220W<br>3.5.4.10 : YMR120C<br>2.1.2.3 : YMR120C<br>4.3.2.2 : YLR359W<br>6.3.2.6 : YAR015W<br>4.1.1.21 : YOR128C<br>6.3.3.1 : YGL234W<br>6.3.5.3 : YGR061C<br>2.1.2.2 : YDR408C<br>6.3.4.13 : YGL234W<br>2.4.2.14 : YMR300C |

Assignments for the pathway "purine biosynthesis 2" (rosetta data set). There are 16 possible assignments of genes to reactions.

| Number | Normalized Score | Number of Pairs | Positive Pairs | Negative Pairs | Zero Pairs | Assignments                                                                                                                                                                                                                                                                                              |
|--------|------------------|-----------------|----------------|----------------|------------|----------------------------------------------------------------------------------------------------------------------------------------------------------------------------------------------------------------------------------------------------------------------------------------------------------|
| 4      | 15.88            | 90              | 79             | 11             | 1          | 6.3.5.2 : YMR217W<br>1.1.1.205 : YLR432W<br>4.3.2.2 : YLR359W<br>6.3.4.4 : YNL220W<br>3.5.4.10 : YMR120C<br>2.1.2.3 : YMR120C<br>4.3.2.2 : YLR359W<br>6.3.2.6 : YAR015W<br>4.1.1.21 : YOR128C<br>6.3.3.1 : YGL234W<br>6.3.5.3 : YGR061C<br>2.1.2.2 : YDR408C<br>6.3.4.13 : YGL234W<br>2.4.2.14 : YMR300C |
| 5      | 15.08            | 77              | 70             | 7              | 14         | 6.3.5.2 : YMR217W<br>1.1.1.205 : 4401<br>4.3.2.2 : YLR359W<br>6.3.4.4 : YNL220W<br>3.5.4.10 : YMR120C<br>2.1.2.3 : YLR028C<br>4.3.2.2 : YLR359W<br>6.3.2.6 : YAR015W<br>4.1.1.21 : YOR128C<br>6.3.3.1 : YGL234W<br>6.3.5.3 : YGR061C<br>2.1.2.2 : YDR408C<br>6.3.4.13 : YGL234W<br>2.4.2.14 : YMR300C    |
| 6      | 15.08            | 77              | 70             | 7              | 14         | 6.3.5.2 : YMR217W<br>1.1.1.205 : 4401<br>4.3.2.2 : YLR359W<br>6.3.4.4 : YNL220W<br>3.5.4.10 : YLR028C<br>2.1.2.3 : YMR120C<br>4.3.2.2 : YLR359W<br>6.3.2.6 : YAR015W<br>4.1.1.21 : YOR128C<br>6.3.3.1 : YGL234W<br>6.3.5.3 : YGR061C<br>2.1.2.2 : YDR408C<br>6.3.4.13 : YGL234W<br>2.4.2.14 : YMR300C    |

Assignments for the pathway "purine biosynthesis 2" (rosetta data set). There are 16 possible assignments of genes to reactions.



| Number | Normalized Score | Number of Pairs | Positive Pairs | Negative Pairs | Zero Pairs | Assignments                                                                                                                                                                                                                                                                                              |
|--------|------------------|-----------------|----------------|----------------|------------|----------------------------------------------------------------------------------------------------------------------------------------------------------------------------------------------------------------------------------------------------------------------------------------------------------|
| 7      | 13.23            | 90              | 78             | 12             | 1          | 6.3.5.2 : YMR217W<br>1.1.1.205 : YAR073W<br>4.3.2.2 : YLR359W<br>6.3.4.4 : YNL220W<br>3.5.4.10 : YMR120C<br>2.1.2.3 : YLR028C<br>4.3.2.2 : YLR359W<br>6.3.2.6 : YAR015W<br>4.1.1.21 : YOR128C<br>6.3.3.1 : YGL234W<br>6.3.5.3 : YGR061C<br>2.1.2.2 : YDR408C<br>6.3.4.13 : YGL234W<br>2.4.2.14 : YMR300C |
| 8      | 13.23            | 90              | 78             | 12             | 1          | 6.3.5.2 : YMR217W<br>1.1.1.205 : YAR073W<br>4.3.2.2 : YLR359W<br>6.3.4.4 : YNL220W<br>3.5.4.10 : YLR028C<br>2.1.2.3 : YMR120C<br>4.3.2.2 : YLR359W<br>6.3.2.6 : YAR015W<br>4.1.1.21 : YOR128C<br>6.3.3.1 : YGL234W<br>6.3.5.3 : YGR061C<br>2.1.2.2 : YDR408C<br>6.3.4.13 : YGL234W<br>2.4.2.14 : YMR300C |
| 9      | 13.22            | 90              | 76             | 14             | 1          | 6.3.5.2 : YMR217W<br>1.1.1.205 : YLR432W<br>4.3.2.2 : YLR359W<br>6.3.4.4 : YNL220W<br>3.5.4.10 : YMR120C<br>2.1.2.3 : YLR028C<br>4.3.2.2 : YLR359W<br>6.3.2.6 : YAR015W<br>4.1.1.21 : YOR128C<br>6.3.3.1 : YGL234W<br>6.3.5.3 : YGR061C<br>2.1.2.2 : YDR408C<br>6.3.4.13 : YGL234W<br>2.4.2.14 : YMR300C |

Assignments for the pathway "purine biosynthesis 2" (rosetta data set). There are 16 possible assignments of genes to reactions.

| Number | Normalized Score | Number of Pairs | Positive Pairs | Negative Pairs | Zero Pairs | Assignments                                                                                                                                                                                                                                                                                              |
|--------|------------------|-----------------|----------------|----------------|------------|----------------------------------------------------------------------------------------------------------------------------------------------------------------------------------------------------------------------------------------------------------------------------------------------------------|
| 10     | 13.22            | 90              | 76             | 14             | 1          | 6.3.5.2 : YMR217W<br>1.1.1.205 : YLR432W<br>4.3.2.2 : YLR359W<br>6.3.4.4 : YNL220W<br>3.5.4.10 : YLR028C<br>2.1.2.3 : YMR120C<br>4.3.2.2 : YLR359W<br>6.3.2.6 : YAR015W<br>4.1.1.21 : YOR128C<br>6.3.3.1 : YGL234W<br>6.3.5.3 : YGR061C<br>2.1.2.2 : YDR408C<br>6.3.4.13 : YGL234W<br>2.4.2.14 : YMR300C |
| 11     | 13.22            | 90              | 77             | 13             | 1          | 6.3.5.2 : YMR217W<br>1.1.1.205 : YHR216W<br>4.3.2.2 : YLR359W<br>6.3.4.4 : YNL220W<br>3.5.4.10 : YMR120C<br>2.1.2.3 : YLR028C<br>4.3.2.2 : YLR359W<br>6.3.2.6 : YAR015W<br>4.1.1.21 : YOR128C<br>6.3.3.1 : YGL234W<br>6.3.5.3 : YGR061C<br>2.1.2.2 : YDR408C<br>6.3.4.13 : YGL234W<br>2.4.2.14 : YMR300C |
| 12     | 13.22            | 90              | 77             | 13             | 1          | 6.3.5.2 : YMR217W<br>1.1.1.205 : YHR216W<br>4.3.2.2 : YLR359W<br>6.3.4.4 : YNL220W<br>3.5.4.10 : YLR028C<br>2.1.2.3 : YMR120C<br>4.3.2.2 : YLR359W<br>6.3.2.6 : YAR015W<br>4.1.1.21 : YOR128C<br>6.3.3.1 : YGL234W<br>6.3.5.3 : YGR061C<br>2.1.2.2 : YDR408C<br>6.3.4.13 : YGL234W<br>2.4.2.14 : YMR300C |

Assignments for the pathway "purine biosynthesis 2" (rosetta data set). There are 16 possible assignments of genes to reactions.

| Number | Normalized Score | Number of Pairs | Positive Pairs | Negative Pairs | Zero Pairs | Assignments                                                                                                                                                                                                                                                                                              |
|--------|------------------|-----------------|----------------|----------------|------------|----------------------------------------------------------------------------------------------------------------------------------------------------------------------------------------------------------------------------------------------------------------------------------------------------------|
| 13     | 12.95            | 77              | 67             | 10             | 14         | 6.3.5.2 : YMR217W<br>1.1.1.205 : 4401<br>4.3.2.2 : YLR359W<br>6.3.4.4 : YNL220W<br>3.5.4.10 : YLR028C<br>2.1.2.3 : YLR028C<br>4.3.2.2 : YLR359W<br>6.3.2.6 : YAR015W<br>4.1.1.21 : YOR128C<br>6.3.3.1 : YGL234W<br>6.3.5.3 : YGR061C<br>2.1.2.2 : YDR408C<br>6.3.4.13 : YGL234W<br>2.4.2.14 : YMR300C    |
| 14     | 11.46            | 90              | 76             | 14             | 1          | 6.3.5.2 : YMR217W<br>1.1.1.205 : YAR073W<br>4.3.2.2 : YLR359W<br>6.3.4.4 : YNL220W<br>3.5.4.10 : YLR028C<br>2.1.2.3 : YLR028C<br>4.3.2.2 : YLR359W<br>6.3.2.6 : YAR015W<br>4.1.1.21 : YOR128C<br>6.3.3.1 : YGL234W<br>6.3.5.3 : YGR061C<br>2.1.2.2 : YDR408C<br>6.3.4.13 : YGL234W<br>2.4.2.14 : YMR300C |
| 15     | 11.45            | 90              | 73             | 17             | 1          | 6.3.5.2 : YMR217W<br>1.1.1.205 : YLR432W<br>4.3.2.2 : YLR359W<br>6.3.4.4 : YNL220W<br>3.5.4.10 : YLR028C<br>2.1.2.3 : YLR028C<br>4.3.2.2 : YLR359W<br>6.3.2.6 : YAR015W<br>4.1.1.21 : YOR128C<br>6.3.3.1 : YGL234W<br>6.3.5.3 : YGR061C<br>2.1.2.2 : YDR408C<br>6.3.4.13 : YGL234W<br>2.4.2.14 : YMR300C |

Assignments for the pathway "purine biosynthesis 2"  
(rosetta data set). There are 16 possible assignments of  
genes to reactions.

| Number | Normalized Score | Number of Pairs | Positive Pairs | Negative Pairs | Zero Pairs | Assignments                                                                                                                                                                                                                                                                                              |
|--------|------------------|-----------------|----------------|----------------|------------|----------------------------------------------------------------------------------------------------------------------------------------------------------------------------------------------------------------------------------------------------------------------------------------------------------|
| 16     | 11.44            | 90              | 75             | 15             | 1          | 6.3.5.2 : YMR217W<br>1.1.1.205 : YHR216W<br>4.3.2.2 : YLR359W<br>6.3.4.4 : YNL220W<br>3.5.4.10 : YLR028C<br>2.1.2.3 : YLR028C<br>4.3.2.2 : YLR359W<br>6.3.2.6 : YAR015W<br>4.1.1.21 : YOR128C<br>6.3.3.1 : YGL234W<br>6.3.5.3 : YGR061C<br>2.1.2.2 : YDR408C<br>6.3.4.13 : YGL234W<br>2.4.2.14 : YMR300C |

Table 6: Assignments for the pathway "purine biosynthesis 2" (rosetta data set). There are 16 possible assignments of genes to reactions.

| Number | Normalized Score | Number of Pairs | Positive Pairs | Negative Pairs | Zero Pairs | Assignments                                                                                                                                                                                                       |
|--------|------------------|-----------------|----------------|----------------|------------|-------------------------------------------------------------------------------------------------------------------------------------------------------------------------------------------------------------------|
| 1      | 1.93             | 43              | 23             | 20             | 2          | 2.7.4.6 : YKL067W<br>2.4.2.10 : YML106W<br>6.3.4.2 : YJR103W<br>2.7.4.6 : YKL067W<br>4.1.1.23 : YEL021W<br>2.4.2.10 : YML106W<br>1.3.3.1 : YKL216W<br>3.5.2.3 : YLR420W<br>2.1.3.2 : YJL130C<br>6.3.5.5 : YJL130C |
| 2      | 1.71             | 43              | 21             | 22             | 2          | 2.7.4.6 : YKL067W<br>2.4.2.10 : YMR271C<br>6.3.4.2 : YJR103W<br>2.7.4.6 : YKL067W<br>4.1.1.23 : YEL021W<br>2.4.2.10 : YMR271C<br>1.3.3.1 : YKL216W<br>3.5.2.3 : YLR420W<br>2.1.3.2 : YJL130C<br>6.3.5.5 : YJL130C |

Assignments for the pathway "de novo biosynthesis of pyrimidine ribonucleotides" (rosetta data set). There are 12 possible assignments of genes to reactions.

| Number | Normalized Score | Number of Pairs | Positive Pairs | Negative Pairs | Zero Pairs | Assignments                                                                                                                                                                                                       |
|--------|------------------|-----------------|----------------|----------------|------------|-------------------------------------------------------------------------------------------------------------------------------------------------------------------------------------------------------------------|
| 3      | 1.58             | 43              | 23             | 20             | 2          | 2.7.4.6 : YKL067W<br>2.4.2.10 : YML106W<br>6.3.4.2 : YBL039C<br>2.7.4.6 : YKL067W<br>4.1.1.23 : YEL021W<br>2.4.2.10 : YML106W<br>1.3.3.1 : YKL216W<br>3.5.2.3 : YLR420W<br>2.1.3.2 : YJL130C<br>6.3.5.5 : YJL130C |
| 4      | 1.26             | 43              | 21             | 22             | 2          | 2.7.4.6 : YKL067W<br>2.4.2.10 : YMR271C<br>6.3.4.2 : YJR103W<br>2.7.4.6 : YKL067W<br>4.1.1.23 : YEL021W<br>2.4.2.10 : YMR271C<br>1.3.3.1 : YKL216W<br>3.5.2.3 : YLR420W<br>2.1.3.2 : YJL130C<br>6.3.5.5 : YJR109C |
| 5      | 1.00             | 43              | 21             | 22             | 2          | 2.7.4.6 : YKL067W<br>2.4.2.10 : YMR271C<br>6.3.4.2 : YJR103W<br>2.7.4.6 : YKL067W<br>4.1.1.23 : YEL021W<br>2.4.2.10 : YMR271C<br>1.3.3.1 : YKL216W<br>3.5.2.3 : YLR420W<br>2.1.3.2 : YJL130C<br>6.3.5.5 : YOR303W |
| 6      | 0.28             | 43              | 19             | 24             | 2          | 2.7.4.6 : YKL067W<br>2.4.2.10 : YMR271C<br>6.3.4.2 : YBL039C<br>2.7.4.6 : YKL067W<br>4.1.1.23 : YEL021W<br>2.4.2.10 : YMR271C<br>1.3.3.1 : YKL216W<br>3.5.2.3 : YLR420W<br>2.1.3.2 : YJL130C<br>6.3.5.5 : YJL130C |

Assignments for the pathway "de novo biosynthesis of pyrimidine ribonucleotides" (rosetta data set). There are 12 possible assignments of genes to reactions.

| Number | Normalized Score | Number of Pairs | Positive Pairs | Negative Pairs | Zero Pairs | Assignments                                                                                                                                                                                                       |
|--------|------------------|-----------------|----------------|----------------|------------|-------------------------------------------------------------------------------------------------------------------------------------------------------------------------------------------------------------------|
| 7      | -0.05            | 43              | 19             | 24             | 2          | 2.7.4.6 : YKL067W<br>2.4.2.10 : YMR271C<br>6.3.4.2 : YBL039C<br>2.7.4.6 : YKL067W<br>4.1.1.23 : YEL021W<br>2.4.2.10 : YMR271C<br>1.3.3.1 : YKL216W<br>3.5.2.3 : YLR420W<br>2.1.3.2 : YJL130C<br>6.3.5.5 : YJR109C |
| 8      | -0.16            | 43              | 19             | 24             | 2          | 2.7.4.6 : YKL067W<br>2.4.2.10 : YML106W<br>6.3.4.2 : YJR103W<br>2.7.4.6 : YKL067W<br>4.1.1.23 : YEL021W<br>2.4.2.10 : YML106W<br>1.3.3.1 : YKL216W<br>3.5.2.3 : YLR420W<br>2.1.3.2 : YJL130C<br>6.3.5.5 : YOR303W |
| 9      | -0.27            | 43              | 19             | 24             | 2          | 2.7.4.6 : YKL067W<br>2.4.2.10 : YML106W<br>6.3.4.2 : YJR103W<br>2.7.4.6 : YKL067W<br>4.1.1.23 : YEL021W<br>2.4.2.10 : YML106W<br>1.3.3.1 : YKL216W<br>3.5.2.3 : YLR420W<br>2.1.3.2 : YJL130C<br>6.3.5.5 : YJR109C |
| 10     | -0.36            | 43              | 19             | 24             | 2          | 2.7.4.6 : YKL067W<br>2.4.2.10 : YMR271C<br>6.3.4.2 : YBL039C<br>2.7.4.6 : YKL067W<br>4.1.1.23 : YEL021W<br>2.4.2.10 : YMR271C<br>1.3.3.1 : YKL216W<br>3.5.2.3 : YLR420W<br>2.1.3.2 : YJL130C<br>6.3.5.5 : YOR303W |

Assignments for the pathway "de novo biosynthesis of pyrimidine ribonucleotides" (rosetta data set). There are 12 possible assignments of genes to reactions.

| Number | Normalized Score | Number of Pairs | Positive Pairs | Negative Pairs | Zero Pairs | Assignments                                                                                                                                                                                                       |
|--------|------------------|-----------------|----------------|----------------|------------|-------------------------------------------------------------------------------------------------------------------------------------------------------------------------------------------------------------------|
| 11     | -0.44            | 43              | 19             | 24             | 2          | 2.7.4.6 : YKL067W<br>2.4.2.10 : YML106W<br>6.3.4.2 : YBL039C<br>2.7.4.6 : YKL067W<br>4.1.1.23 : YEL021W<br>2.4.2.10 : YML106W<br>1.3.3.1 : YKL216W<br>3.5.2.3 : YLR420W<br>2.1.3.2 : YJL130C<br>6.3.5.5 : YOR303W |
| 12     | -0.50            | 43              | 19             | 24             | 2          | 2.7.4.6 : YKL067W<br>2.4.2.10 : YML106W<br>6.3.4.2 : YBL039C<br>2.7.4.6 : YKL067W<br>4.1.1.23 : YEL021W<br>2.4.2.10 : YML106W<br>1.3.3.1 : YKL216W<br>3.5.2.3 : YLR420W<br>2.1.3.2 : YJL130C<br>6.3.5.5 : YJR109C |

Table 7: Assignments for the pathway "de novo biosynthesis of pyrimidine ribonucleotides" (rosetta data set). There are 12 possible assignments of genes to reactions.

| Number | Normalized Score | Number of Pairs | Positive Pairs | Negative Pairs | Zero Pairs | Assignments                                                                                               |
|--------|------------------|-----------------|----------------|----------------|------------|-----------------------------------------------------------------------------------------------------------|
| 1      | 32.66            | 6               | 6              | 0              | 4          | 4.2.1.16 : 570<br>4.1.3.18 : YMR108W<br>1.1.1.86 : YLR355C<br>2.6.1.42 : YHR208W<br>4.2.1.9 : YJR016C     |
| 2      | 31.33            | 10              | 10             | 0              | 0          | 4.2.1.16 : YER086W<br>4.1.3.18 : YMR108W<br>1.1.1.86 : YLR355C<br>2.6.1.42 : YHR208W<br>4.2.1.9 : YJR016C |
| 3      | 28.87            | 10              | 10             | 0              | 0          | 4.2.1.16 : YKL218C<br>4.1.3.18 : YMR108W<br>1.1.1.86 : YLR355C<br>2.6.1.42 : YHR208W<br>4.2.1.9 : YJR016C |
| 4      | 27.91            | 10              | 10             | 0              | 0          | 4.2.1.16 : YER086W<br>4.1.3.18 : YMR108W<br>1.1.1.86 : YLR355C<br>2.6.1.42 : YJR148W<br>4.2.1.9 : YJR016C |

Assignments for the pathway "isoleucine biosynthesis I" (rosetta data set). There are 12 possible assignments of genes to reactions.

| Number | Normalized Score | Number of Pairs | Positive Pairs | Negative Pairs | Zero Pairs | Assignments                                                                                               |
|--------|------------------|-----------------|----------------|----------------|------------|-----------------------------------------------------------------------------------------------------------|
| 5      | 27.84            | 6               | 6              | 0              | 4          | 4.2.1.16 : 570<br>4.1.3.18 : YMR108W<br>1.1.1.86 : YLR355C<br>2.6.1.42 : YJR148W<br>4.2.1.9 : YJR016C     |
| 6      | 27.67            | 10              | 10             | 0              | 0          | 4.2.1.16 : YER086W<br>4.1.3.18 : YCL009C<br>1.1.1.86 : YLR355C<br>2.6.1.42 : YHR208W<br>4.2.1.9 : YJR016C |
| 7      | 27.10            | 6               | 6              | 0              | 4          | 4.2.1.16 : 570<br>4.1.3.18 : YCL009C<br>1.1.1.86 : YLR355C<br>2.6.1.42 : YHR208W<br>4.2.1.9 : YJR016C     |
| 8      | 26.19            | 10              | 10             | 0              | 0          | 4.2.1.16 : YKL218C<br>4.1.3.18 : YMR108W<br>1.1.1.86 : YLR355C<br>2.6.1.42 : YJR148W<br>4.2.1.9 : YJR016C |
| 9      | 25.04            | 10              | 10             | 0              | 0          | 4.2.1.16 : YER086W<br>4.1.3.18 : YCL009C<br>1.1.1.86 : YLR355C<br>2.6.1.42 : YJR148W<br>4.2.1.9 : YJR016C |
| 10     | 24.58            | 10              | 10             | 0              | 0          | 4.2.1.16 : YKL218C<br>4.1.3.18 : YCL009C<br>1.1.1.86 : YLR355C<br>2.6.1.42 : YHR208W<br>4.2.1.9 : YJR016C |
| 11     | 23.59            | 6               | 6              | 0              | 4          | 4.2.1.16 : 570<br>4.1.3.18 : YCL009C<br>1.1.1.86 : YLR355C<br>2.6.1.42 : YJR148W<br>4.2.1.9 : YJR016C     |
| 12     | 22.68            | 10              | 10             | 0              | 0          | 4.2.1.16 : YKL218C<br>4.1.3.18 : YCL009C<br>1.1.1.86 : YLR355C<br>2.6.1.42 : YJR148W<br>4.2.1.9 : YJR016C |

Table 8: Assignments for the pathway "isoleucine biosynthesis I" (rosetta data set). There are 12 possible assignments of genes to reactions.



| Number | Normalized Score | Number of Pairs | Positive Pairs | Negative Pairs | Zero Pairs | Assignments                                                                                            |
|--------|------------------|-----------------|----------------|----------------|------------|--------------------------------------------------------------------------------------------------------|
| 1      | 12.00            | 10              | 9              | 1              | 0          | 1.1.1.44 : YHR183W<br>5.3.1.6 : YOR095C<br>5.1.3.1 : YJL121C<br>2.2.1.1 : YPR074C<br>2.2.1.2 : YLR354C |
| 2      | 7.27             | 10              | 8              | 2              | 0          | 1.1.1.44 : YGR256W<br>5.3.1.6 : YOR095C<br>5.1.3.1 : YJL121C<br>2.2.1.1 : YPR074C<br>2.2.1.2 : YLR354C |
| 3      | 5.58             | 10              | 8              | 2              | 0          | 1.1.1.44 : YHR183W<br>5.3.1.6 : YOR095C<br>5.1.3.1 : YJL121C<br>2.2.1.1 : YBR117C<br>2.2.1.2 : YLR354C |
| 4      | 4.66             | 10              | 6              | 4              | 0          | 1.1.1.44 : YHR183W<br>5.3.1.6 : YOR095C<br>5.1.3.1 : YJL121C<br>2.2.1.1 : YPR074C<br>2.2.1.2 : YGR043C |
| 5      | 2.25             | 10              | 7              | 3              | 0          | 1.1.1.44 : YGR256W<br>5.3.1.6 : YOR095C<br>5.1.3.1 : YJL121C<br>2.2.1.1 : YBR117C<br>2.2.1.2 : YLR354C |
| 6      | 2.11             | 10              | 6              | 4              | 0          | 1.1.1.44 : YGR256W<br>5.3.1.6 : YOR095C<br>5.1.3.1 : YJL121C<br>2.2.1.1 : YPR074C<br>2.2.1.2 : YGR043C |
| 7      | 0.58             | 10              | 6              | 4              | 0          | 1.1.1.44 : YHR183W<br>5.3.1.6 : YOR095C<br>5.1.3.1 : YJL121C<br>2.2.1.1 : YBR117C<br>2.2.1.2 : YGR043C |
| 8      | -0.57            | 10              | 6              | 4              | 0          | 1.1.1.44 : YGR256W<br>5.3.1.6 : YOR095C<br>5.1.3.1 : YJL121C<br>2.2.1.1 : YBR117C<br>2.2.1.2 : YGR043C |

Table 9: Assignments for the pathway "non-oxidative branch of the pentose phosphate pathway" (rosetta data set). There are 8 possible assignments of genes to reactions.

| Number | Normalized Score | Number of Pairs | Positive Pairs | Negative Pairs | Zero Pairs | Assignments                                                                        |
|--------|------------------|-----------------|----------------|----------------|------------|------------------------------------------------------------------------------------|
| 1      | 28.64            | 6               | 6              | 0              | 0          | 3.1.3.12 : YDR074W<br>2.4.1.15 : YBR126C<br>2.7.7.9 : YKL035W<br>5.4.2.2 : YMR105C |
| 2      | 27.40            | 6               | 6              | 0              | 0          | 3.1.3.12 : YDR074W<br>2.4.1.15 : YML100W<br>2.7.7.9 : YKL035W<br>5.4.2.2 : YMR105C |
| 3      | 15.65            | 6               | 6              | 0              | 0          | 3.1.3.12 : YDR074W<br>2.4.1.15 : YBR126C<br>2.7.7.9 : YKL035W<br>5.4.2.2 : YKL127W |
| 4      | 13.02            | 6               | 5              | 1              | 0          | 3.1.3.12 : YDR074W<br>2.4.1.15 : YML100W<br>2.7.7.9 : YKL035W<br>5.4.2.2 : YKL127W |
| 5      | 12.16            | 6               | 4              | 2              | 0          | 3.1.3.12 : YDR074W<br>2.4.1.15 : YML100W<br>2.7.7.9 : YHL012W<br>5.4.2.2 : YMR105C |
| 6      | 10.16            | 6               | 3              | 3              | 0          | 3.1.3.12 : YDR074W<br>2.4.1.15 : YBR126C<br>2.7.7.9 : YHL012W<br>5.4.2.2 : YMR105C |
| 7      | 2.23             | 6               | 4              | 2              | 0          | 3.1.3.12 : YDR074W<br>2.4.1.15 : YML100W<br>2.7.7.9 : YHL012W<br>5.4.2.2 : YKL127W |
| 8      | 1.63             | 6               | 4              | 2              | 0          | 3.1.3.12 : YDR074W<br>2.4.1.15 : YBR126C<br>2.7.7.9 : YHL012W<br>5.4.2.2 : YKL127W |

Table 10: Assignments for the pathway "trehalose anabolism" (rosetta data set). There are 8 possible assignments of genes to reactions.

| Number | Normalized Score | Number of Pairs | Positive Pairs | Negative Pairs | Zero Pairs | Assignments                                                    |
|--------|------------------|-----------------|----------------|----------------|------------|----------------------------------------------------------------|
| 1      | 10.45            | 3               | 3              | 0              | 0          | 1.1.1.49 : YNL241C<br>1.1.1.44 : YGR256W<br>3.1.1.31 : YNR034W |
| 2      | 8.52             | 3               | 3              | 0              | 0          | 1.1.1.49 : YNL241C<br>1.1.1.44 : YGR256W<br>3.1.1.31 : YGR248W |
| 3      | 7.70             | 3               | 3              | 0              | 0          | 1.1.1.49 : YNL241C<br>1.1.1.44 : YHR183W<br>3.1.1.31 : YNR034W |

Assignments for the pathway "oxidative branch of the pentose phosphate pathway" (rosetta data set). There are 6 possible assignments of genes to reactions.

| Number | Normalized Score | Number of Pairs | Positive Pairs | Negative Pairs | Zero Pairs | Assignments                                                    |
|--------|------------------|-----------------|----------------|----------------|------------|----------------------------------------------------------------|
| 4      | 5.37             | 3               | 2              | 1              | 0          | 1.1.1.49 : YNL241C<br>1.1.1.44 : YGR256W<br>3.1.1.31 : YHR163W |
| 5      | 4.97             | 3               | 2              | 1              | 0          | 1.1.1.49 : YNL241C<br>1.1.1.44 : YHR183W<br>3.1.1.31 : YHR163W |
| 6      | 1.53             | 3               | 2              | 1              | 0          | 1.1.1.49 : YNL241C<br>1.1.1.44 : YHR183W<br>3.1.1.31 : YGR248W |

Table 11: Assignments for the pathway "oxidative branch of the pentose phosphate pathway" (rosetta data set). There are 6 possible assignments of genes to reactions.

| Number | Normalized Score | Number of Pairs | Positive Pairs | Negative Pairs | Zero Pairs | Assignments                                                 |
|--------|------------------|-----------------|----------------|----------------|------------|-------------------------------------------------------------|
| 1      | 9.91             | 3               | 3              | 0              | 0          | 3.6.1.1 : YBR011C<br>5.1.3.2 : YBR019C<br>2.7.7.9 : YKL035W |
| 2      | 6.43             | 3               | 3              | 0              | 0          | 3.6.1.1 : YMR267W<br>5.1.3.2 : YBR019C<br>2.7.7.9 : YKL035W |
| 3      | -5.72            | 3               | 1              | 2              | 0          | 3.6.1.1 : YMR267W<br>5.1.3.2 : YBR019C<br>2.7.7.9 : YHL012W |
| 4      | -6.41            | 3               | 1              | 2              | 0          | 3.6.1.1 : YBR011C<br>5.1.3.2 : YBR019C<br>2.7.7.9 : YHL012W |

Table 12: Assignments for the pathway "UDP-glucose conversion" (rosetta data set). There are 4 possible assignments of genes to reactions.

| Number | Normalized Score | Number of Pairs | Positive Pairs | Negative Pairs | Zero Pairs | Assignments                            |
|--------|------------------|-----------------|----------------|----------------|------------|----------------------------------------|
| 1      | 25.06            | 1               | 1              | 0              | 0          | 2.6.1.1 : YLR027C<br>6.4.1.1 : YBR218C |
| 2      | 17.11            | 1               | 1              | 0              | 0          | 2.6.1.1 : YLR027C<br>6.4.1.1 : YGL062W |
| 3      | 13.08            | 1               | 1              | 0              | 0          | 2.6.1.1 : YKL106W<br>6.4.1.1 : YBR218C |
| 4      | 6.66             | 1               | 1              | 0              | 0          | 2.6.1.1 : YKL106W<br>6.4.1.1 : YGL062W |

Table 13: Assignments for the pathway "aspartate biosynthesis II" (rosetta data set). There are 4 possible assignments of genes to reactions.

| Number | Normalized Score | Number of Pairs | Positive Pairs | Negative Pairs | Zero Pairs | Assignments                            |
|--------|------------------|-----------------|----------------|----------------|------------|----------------------------------------|
| 1      | 27.27            | 1               | 1              | 0              | 0          | 6.3.5.4 : YPR145W<br>2.6.1.1 : YLR027C |
| 2      | 24.28            | 1               | 1              | 0              | 0          | 6.3.5.4 : YGR124W<br>2.6.1.1 : YLR027C |
| 3      | 12.50            | 1               | 1              | 0              | 0          | 6.3.5.4 : YPR145W<br>2.6.1.1 : YKL106W |
| 4      | 10.60            | 1               | 1              | 0              | 0          | 6.3.5.4 : YGR124W<br>2.6.1.1 : YKL106W |

Table 14: Assignments for the pathway "asparagine biosynthesis I" (rosetta data set). There are 4 possible assignments of genes to reactions.

| Number | Normalized Score | Number of Pairs | Positive Pairs | Negative Pairs | Zero Pairs | Assignments                                                                       |
|--------|------------------|-----------------|----------------|----------------|------------|-----------------------------------------------------------------------------------|
| 1      | 9.54             | 6               | 6              | 0              | 0          | 2.7.7.9 : YKL035W<br>5.1.3.2 : YBR019C<br>2.7.7.12 : YBR018C<br>2.7.1.6 : YDR009W |
| 2      | 5.35             | 6               | 6              | 0              | 0          | 2.7.7.9 : YKL035W<br>5.1.3.2 : YBR019C<br>2.7.7.12 : YBR018C<br>2.7.1.6 : YBR020W |
| 3      | -2.36            | 6               | 4              | 2              | 0          | 2.7.7.9 : YHL012W<br>5.1.3.2 : YBR019C<br>2.7.7.12 : YBR018C<br>2.7.1.6 : YBR020W |
| 4      | -3.34            | 6               | 3              | 3              | 0          | 2.7.7.9 : YHL012W<br>5.1.3.2 : YBR019C<br>2.7.7.12 : YBR018C<br>2.7.1.6 : YDR009W |

Table 15: Assignments for the pathway "galactose metabolism" (rosetta data set). There are 4 possible assignments of genes to reactions.

| Number | Normalized Score | Number of Pairs | Positive Pairs | Negative Pairs | Zero Pairs | Assignments                                                                         |
|--------|------------------|-----------------|----------------|----------------|------------|-------------------------------------------------------------------------------------|
| 1      | 32.66            | 6               | 6              | 0              | 0          | 4.1.3.18 : YMR108W<br>1.1.1.86 : YLR355C<br>2.6.1.42 : YHR208W<br>4.2.1.9 : YJR016C |
| 2      | 27.84            | 6               | 6              | 0              | 0          | 4.1.3.18 : YMR108W<br>1.1.1.86 : YLR355C<br>2.6.1.42 : YJR148W<br>4.2.1.9 : YJR016C |

Assignments for the pathway "valine biosynthesis" (rosetta data set). There are 4 possible assignments of genes to reactions.

| Number | Normalized Score | Number of Pairs | Positive Pairs | Negative Pairs | Zero Pairs | Assignments                                                                         |
|--------|------------------|-----------------|----------------|----------------|------------|-------------------------------------------------------------------------------------|
| 3      | 27.10            | 6               | 6              | 0              | 0          | 4.1.3.18 : YCL009C<br>1.1.1.86 : YLR355C<br>2.6.1.42 : YHR208W<br>4.2.1.9 : YJR016C |
| 4      | 23.59            | 6               | 6              | 0              | 0          | 4.1.3.18 : YCL009C<br>1.1.1.86 : YLR355C<br>2.6.1.42 : YJR148W<br>4.2.1.9 : YJR016C |

Table 16: Assignments for the pathway "valine biosynthesis" (rosetta data set). There are 4 possible assignments of genes to reactions.

| Number | Normalized Score | Number of Pairs | Positive Pairs | Negative Pairs | Zero Pairs | Assignments                                                                      |
|--------|------------------|-----------------|----------------|----------------|------------|----------------------------------------------------------------------------------|
| 1      | 26.89            | 3               | 3              | 0              | 3          | 4.1.3.12 : YNL104C<br>4.2.1.33 : YGL009C<br>2.6.1.42 : YHR208W<br>1.1.1.85 : 612 |
| 2      | 25.45            | 3               | 3              | 0              | 3          | 4.1.3.12 : YOR108W<br>4.2.1.33 : YGL009C<br>2.6.1.42 : YHR208W<br>1.1.1.85 : 612 |
| 3      | 20.02            | 3               | 3              | 0              | 3          | 4.1.3.12 : YNL104C<br>4.2.1.33 : YGL009C<br>2.6.1.42 : YJR148W<br>1.1.1.85 : 612 |
| 4      | 18.80            | 3               | 3              | 0              | 3          | 4.1.3.12 : YOR108W<br>4.2.1.33 : YGL009C<br>2.6.1.42 : YJR148W<br>1.1.1.85 : 612 |

Table 17: Assignments for the pathway "leucine biosynthesis" (rosetta data set). There are 4 possible assignments of genes to reactions.

| Number | Normalized Score | Number of Pairs | Positive Pairs | Negative Pairs | Zero Pairs | Assignments                              |
|--------|------------------|-----------------|----------------|----------------|------------|------------------------------------------|
| 1      | 8.28             | 1               | 1              | 0              | 0          | 1.11.1.6 : YGR088W<br>1.15.1.1 : YHR008C |
| 2      | 1.92             | 1               | 1              | 0              | 0          | 1.11.1.6 : YGR088W<br>1.15.1.1 : YJR104C |
| 3      | -1.62            | 1               | 0              | 1              | 0          | 1.11.1.6 : YDR256C<br>1.15.1.1 : YJR104C |
| 4      | -2.55            | 1               | 0              | 1              | 0          | 1.11.1.6 : YDR256C<br>1.15.1.1 : YHR008C |

Table 18: Assignments for the pathway "removal of superoxide radicals" (rosetta data set). There are 4 possible assignments of genes to reactions.

| Number | Normalized Score | Number of Pairs | Positive Pairs | Negative Pairs | Zero Pairs | Assignments                                                                                                                                                                                  |
|--------|------------------|-----------------|----------------|----------------|------------|----------------------------------------------------------------------------------------------------------------------------------------------------------------------------------------------|
| 1      | 27.64            | 36              | 36             | 0              | 0          | 2.3.1.35 : YMR062C<br>6.3.5.5 : YJR109C<br>2.3.1.1 : YJL071W<br>2.7.2.8 : YER069W<br>1.2.1.38 : YER069W<br>2.6.1.11 : YOL140W<br>2.1.3.3 : YJL088W<br>4.3.2.1 : YHR018C<br>6.3.4.5 : YOL058W |
| 2      | 26.46            | 36              | 36             | 0              | 0          | 2.3.1.35 : YMR062C<br>6.3.5.5 : YOR303W<br>2.3.1.1 : YJL071W<br>2.7.2.8 : YER069W<br>1.2.1.38 : YER069W<br>2.6.1.11 : YOL140W<br>2.1.3.3 : YJL088W<br>4.3.2.1 : YHR018C<br>6.3.4.5 : YOL058W |
| 3      | 22.22            | 36              | 36             | 0              | 0          | 2.3.1.35 : YMR062C<br>6.3.5.5 : YJL130C<br>2.3.1.1 : YJL071W<br>2.7.2.8 : YER069W<br>1.2.1.38 : YER069W<br>2.6.1.11 : YOL140W<br>2.1.3.3 : YJL088W<br>4.3.2.1 : YHR018C<br>6.3.4.5 : YOL058W |

Table 19: Assignments for the pathway "arginine biosynthesis, *Bacillus subtilis*" (rosetta data set). There are 3 possible assignments of genes to reactions.

| Number | Normalized Score | Number of Pairs | Positive Pairs | Negative Pairs | Zero Pairs | Assignments                                                                                                |
|--------|------------------|-----------------|----------------|----------------|------------|------------------------------------------------------------------------------------------------------------|
| 1      | 18.20            | 10              | 6              | 4              | 0          | 4.1.3.27 : YER090W<br>2.4.2.18 : YDR354W<br>5.3.1.24 : YDR007W<br>4.1.1.48 : YKL211C<br>4.2.1.20 : YGL026C |
| 2      | 17.37            | 10              | 6              | 4              | 0          | 4.1.3.27 : YKL211C<br>2.4.2.18 : YDR354W<br>5.3.1.24 : YDR007W<br>4.1.1.48 : YKL211C<br>4.2.1.20 : YGL026C |

Table 20: Assignments for the pathway "tryptophan biosynthesis" (rosetta data set). There are 2 possible assignments of genes to reactions.

| Number | Normalized Score | Number of Pairs | Positive Pairs | Negative Pairs | Zero Pairs | Assignments                            |
|--------|------------------|-----------------|----------------|----------------|------------|----------------------------------------|
| 1      | 25.75            | 1               | 1              | 0              | 0          | 2.2.1.1 : YPR074C<br>5.1.3.1 : YJL121C |
| 2      | 0.81             | 1               | 1              | 0              | 0          | 2.2.1.1 : YBR117C<br>5.1.3.1 : YJL121C |

Table 21: Assignments for the pathway "pentose phosphate pathway, *Mycoplasma pneumoniae*" (rosetta data set). There are 2 possible assignments of genes to reactions.

| Number | Normalized Score | Number of Pairs | Positive Pairs | Negative Pairs | Zero Pairs | Assignments                                               |
|--------|------------------|-----------------|----------------|----------------|------------|-----------------------------------------------------------|
| 1      | 17.63            | 1               | 1              | 0              | 2          | 1.2.4.1 : YER178W<br>2.3.1.12 : YNL071W<br>1.8.1.4 : 1891 |
| 2      | 5.23             | 1               | 1              | 0              | 2          | 1.2.4.1 : YBR221C<br>2.3.1.12 : YNL071W<br>1.8.1.4 : 1891 |

Table 22: Assignments for the pathway "pyruvate dehydrogenase" (rosetta data set). There are 2 possible assignments of genes to reactions.

| Number | Normalized Score | Number of Pairs | Positive Pairs | Negative Pairs | Zero Pairs | Assignments                             |
|--------|------------------|-----------------|----------------|----------------|------------|-----------------------------------------|
| 1      | 32.06            | 1               | 1              | 0              | 0          | 2.1.2.10 : YDR019C<br>1.4.4.2 : YMR189W |
| 2      | 32.06            | 1               | 1              | 0              | 0          | 2.1.2.10 : YMR189W<br>1.4.4.2 : YMR189W |

Table 23: Assignments for the pathway "glycine degradation III" (rosetta data set). There are 2 possible assignments of genes to reactions.

| Number | Normalized Score | Number of Pairs | Positive Pairs | Negative Pairs | Zero Pairs | Assignments                                                                         |
|--------|------------------|-----------------|----------------|----------------|------------|-------------------------------------------------------------------------------------|
| 1      | 9.18             | 6               | 6              | 0              | 0          | 4.2.1.22 : YGR155W<br>3.1.3.3 : YGR208W<br>2.6.1.52 : YOR184W<br>1.1.1.95 : YIL074C |
| 2      | 7.01             | 6               | 4              | 2              | 0          | 4.2.1.22 : YGR155W<br>3.1.3.3 : YGR208W<br>2.6.1.52 : YOR184W<br>1.1.1.95 : YER081W |

Table 24: Assignments for the pathway "cysteine biosynthesis II" (rosetta data set). There are 2 possible assignments of genes to reactions.

| Number | Normalized Score | Number of Pairs | Positive Pairs | Negative Pairs | Zero Pairs | Assignments                            |
|--------|------------------|-----------------|----------------|----------------|------------|----------------------------------------|
| 1      | 7.49             | 1               | 1              | 0              | 0          | 3.1.2.6 : YDR272W<br>4.4.1.5 : YML004C |
| 2      | 3.22             | 1               | 1              | 0              | 0          | 3.1.2.6 : YOR040W<br>4.4.1.5 : YML004C |

Table 25: Assignments for the pathway "methylglyoxal degradation" (rosetta data set). There are 2 possible assignments of genes to reactions.

| Number | Normalized Score | Number of Pairs | Positive Pairs | Negative Pairs | Zero Pairs | Assignments                            |
|--------|------------------|-----------------|----------------|----------------|------------|----------------------------------------|
| 1      | -0.68            | 1               | 0              | 1              | 0          | 2.1.2.1 : YLR058C<br>3.1.3.3 : YGR208W |
| 2      | -1.75            | 1               | 0              | 1              | 0          | 2.1.2.1 : YBR263W<br>3.1.3.3 : YGR208W |

Table 26: Assignments for the pathway "glycine biosynthesis I" (rosetta data set). There are 2 possible assignments of genes to reactions.

| Number | Normalized Score | Number of Pairs | Positive Pairs | Negative Pairs | Zero Pairs | Assignments                                                  |
|--------|------------------|-----------------|----------------|----------------|------------|--------------------------------------------------------------|
| 1      | 6.69             | 1               | 1              | 0              | 2          | 4.4.1.8 : 1971<br>4.4.1.1 : YAL012W<br>4.2.1.22 : YGR155W    |
| 2      | 5.58             | 3               | 3              | 0              | 0          | 4.4.1.8 : YGL184C<br>4.4.1.1 : YAL012W<br>4.2.1.22 : YGR155W |

Table 27: Assignments for the pathway "homocysteine and cysteine interconversion" (rosetta data set). There are 2 possible assignments of genes to reactions.

| Number | Normalized Score | Number of Pairs | Positive Pairs | Negative Pairs | Zero Pairs | Assignments                                                    |
|--------|------------------|-----------------|----------------|----------------|------------|----------------------------------------------------------------|
| 1      | 3.43             | 3               | 1              | 2              | 0          | 2.5.1.22 : YLR146C<br>2.5.1.16 : YPR069C<br>4.1.1.17 : YKL184W |
| 2      | -3.00            | 3               | 0              | 3              | 0          | 2.5.1.22 : YLR146C<br>2.5.1.16 : YLR146C<br>4.1.1.17 : YKL184W |

Table 28: Assignments for the pathway "ornithine spermine biosynthesis" (rosetta data set). There are 2 possible assignments of genes to reactions.



| Number | Normalized Score | Number of Pairs | Positive Pairs | Negative Pairs | Zero Pairs | Assignments                             |
|--------|------------------|-----------------|----------------|----------------|------------|-----------------------------------------|
| 1      | 0.34             | 1               | 1              | 0              | 0          | 1.4.1.4 : YOR375C<br>1.4.1.13 : YDL171C |
| 2      | -0.72            | 1               | 0              | 1              | 0          | 1.4.1.4 : YAL062W<br>1.4.1.13 : YDL171C |

Table 29: Assignments for the pathway "glutamate biosynthesis I" (rosetta data set). There are 2 possible assignments of genes to reactions.

| Number | Normalized Score | Number of Pairs | Positive Pairs | Negative Pairs | Zero Pairs | Assignments                                                                                                                                          |
|--------|------------------|-----------------|----------------|----------------|------------|------------------------------------------------------------------------------------------------------------------------------------------------------|
| 1      | 32.78            | 21              | 21             | 0              | 0          | 4.1.2.15 : YBR249C<br>4.6.1.3 : YDR127W<br>4.2.1.10 : YDR127W<br>1.1.1.25 : YDR127W<br>2.7.1.71 : YDR127W<br>2.5.1.19 : YDR127W<br>4.6.1.4 : YGL148W |
| 2      | 31.34            | 21              | 21             | 0              | 0          | 4.1.2.15 : YDR035W<br>4.6.1.3 : YDR127W<br>4.2.1.10 : YDR127W<br>1.1.1.25 : YDR127W<br>2.7.1.71 : YDR127W<br>2.5.1.19 : YDR127W<br>4.6.1.4 : YGL148W |

Table 30: Assignments for the pathway "chorismate biosynthesis" (rosetta data set). There are 2 possible assignments of genes to reactions.

| Number | Normalized Score | Number of Pairs | Positive Pairs | Negative Pairs | Zero Pairs | Assignments                                                   |
|--------|------------------|-----------------|----------------|----------------|------------|---------------------------------------------------------------|
| 1      | 12.04            | 3               | 3              | 0              | 0          | 1.1.1.95 : YIL074C<br>3.1.3.3 : YGR208W<br>2.6.1.52 : YOR184W |
| 2      | 9.68             | 3               | 2              | 1              | 0          | 1.1.1.95 : YER081W<br>3.1.3.3 : YGR208W<br>2.6.1.52 : YOR184W |

Table 31: Assignments for the pathway "serine biosynthesis" (rosetta data set). There are 2 possible assignments of genes to reactions.

| Number | Normalized Score | Number of Pairs | Positive Pairs | Negative Pairs | Zero Pairs | Assignments                                                    |
|--------|------------------|-----------------|----------------|----------------|------------|----------------------------------------------------------------|
| 1      | 2.93             | 3               | 2              | 1              | 0          | 5.4.99.5 : YPR060C<br>4.2.1.51 : YNL316C<br>2.6.1.57 : YGL202W |
| 2      | 1.11             | 3               | 2              | 1              | 0          | 5.4.99.5 : YPR060C<br>4.2.1.51 : YNL316C<br>2.6.1.57 : YHR137W |

Table 32: Assignments for the pathway "phenylalanine biosynthesis I" (rosetta data set). There are 2 possible assignments of genes to reactions.

| Number | Normalized Score | Number of Pairs | Positive Pairs | Negative Pairs | Zero Pairs | Assignments                                                    |
|--------|------------------|-----------------|----------------|----------------|------------|----------------------------------------------------------------|
| 1      | 1.99             | 3               | 1              | 2              | 0          | 5.4.99.5 : YPR060C<br>1.3.1.13 : YBR166C<br>2.6.1.57 : YGL202W |
| 2      | 1.55             | 3               | 1              | 2              | 0          | 5.4.99.5 : YPR060C<br>1.3.1.13 : YBR166C<br>2.6.1.57 : YHR137W |

Table 33: Assignments for the pathway "tyrosine biosynthesis I" (rosetta data set). There are 2 possible assignments of genes to reactions.

| Number | Normalized Score | Number of Pairs | Positive Pairs | Negative Pairs | Zero Pairs | Assignments                                              |
|--------|------------------|-----------------|----------------|----------------|------------|----------------------------------------------------------|
| 1      | 5.44             | 1               | 1              | 0              | 2          | 2.2.1.1 : YPR074C<br>5.3.1.6 : YOR095C<br>2.7.1.15 : 667 |
| 2      | -3.48            | 1               | 0              | 1              | 2          | 2.2.1.1 : YBR117C<br>5.3.1.6 : YOR095C<br>2.7.1.15 : 667 |

Table 34: Assignments for the pathway "ribose degradation" (rosetta data set). There are 2 possible assignments of genes to reactions.

| Number | Normalized Score | Number of Pairs | Positive Pairs | Negative Pairs | Zero Pairs | Assignments                              |
|--------|------------------|-----------------|----------------|----------------|------------|------------------------------------------|
| 1      | 29.96            | 1               | 1              | 0              | 0          | 3.1.3.12 : YDR074W<br>2.4.1.15 : YBR126C |
| 2      | 28.06            | 1               | 1              | 0              | 0          | 3.1.3.12 : YDR074W<br>2.4.1.15 : YML100W |

Table 35: Assignments for the pathway "trehalose biosynthesis" (rosetta data set). There are 2 possible assignments of genes to reactions.

| Number | Normalized Score | Number of Pairs | Positive Pairs | Negative Pairs | Zero Pairs | Assignments                             |
|--------|------------------|-----------------|----------------|----------------|------------|-----------------------------------------|
| 1      | 18.36            | 1               | 1              | 0              | 0          | 2.5.1.6 : YDR502C<br>2.1.1.14 : YER091C |
| 2      | 17.24            | 1               | 1              | 0              | 0          | 2.5.1.6 : YLR180W<br>2.1.1.14 : YER091C |

Table 36: Assignments for the pathway "methionine and S-adenosylmethionine synthesis" (rosetta data set). There are 2 possible assignments of genes to reactions.

| Number | Normalized Score | Number of Pairs | Positive Pairs | Negative Pairs | Zero Pairs | Assignments                                                    |
|--------|------------------|-----------------|----------------|----------------|------------|----------------------------------------------------------------|
| 1      | 11.20            | 3               | 3              | 0              | 0          | 1.2.1.16 : YBR006W<br>4.1.1.15 : YMR250W<br>2.6.1.19 : YGR019W |

Table 37: Assignments for the pathway "glutamate degradation I" (rosetta data set). There are 1 possible assignments of genes to reactions.

| Number | Normalized Score | Number of Pairs | Positive Pairs | Negative Pairs | Zero Pairs | Assignments                                                                    |
|--------|------------------|-----------------|----------------|----------------|------------|--------------------------------------------------------------------------------|
| 1      | 11.64            | 3               | 3              | 0              | 3          | 2.3.1.47 : N/A<br>2.6.1.62 : YNR058W<br>2.8.1.6 : YGR286C<br>6.3.3.3 : YNR057C |

Table 38: Assignments for the pathway "biotin biosynthesis I" (rosetta data set). There are 1 possible assignments of genes to reactions.

| Number | Normalized Score | Number of Pairs | Positive Pairs | Negative Pairs | Zero Pairs | Assignments                                                                                              |
|--------|------------------|-----------------|----------------|----------------|------------|----------------------------------------------------------------------------------------------------------|
| 1      | 23.14            | 10              | 10             | 0              | 0          | 2.3.1.35 : YMR062C<br>2.6.1.11 : YOL140W<br>1.2.1.38 : YER069W<br>2.7.2.8 : YER069W<br>2.3.1.1 : YJL071W |

Table 39: Assignments for the pathway "glutamate degradation VIII" (rosetta data set). There are 1 possible assignments of genes to reactions.

| Number | Normalized Score | Number of Pairs | Positive Pairs | Negative Pairs | Zero Pairs | Assignments                              |
|--------|------------------|-----------------|----------------|----------------|------------|------------------------------------------|
| 1      | 19.35            | 1               | 1              | 0              | 0          | 4.2.99.2 : YCR053W<br>2.7.1.39 : YHR025W |

Table 40: **Assignments for the pathway "threonine biosynthesis from homoserine" (rosetta data set). There are 1 possible assignments of genes to reactions.**

| Number | Normalized Score | Number of Pairs | Positive Pairs | Negative Pairs | Zero Pairs | Assignments                             |
|--------|------------------|-----------------|----------------|----------------|------------|-----------------------------------------|
| 1      | 6.69             | 1               | 1              | 0              | 0          | 4.4.1.1 : YAL012W<br>4.2.1.22 : YGR155W |

Table 41: **Assignments for the pathway "homocysteine degradation I" (rosetta data set). There are 1 possible assignments of genes to reactions.**

| Number | Normalized Score | Number of Pairs | Positive Pairs | Negative Pairs | Zero Pairs | Assignments                              |
|--------|------------------|-----------------|----------------|----------------|------------|------------------------------------------|
| 1      | 7.27             | 1               | 1              | 0              | 0          | 2.3.1.31 : YNL277W<br>2.1.1.14 : YER091C |

Table 42: **Assignments for the pathway "homoserine methionine biosynthesis" (rosetta data set). There are 1 possible assignments of genes to reactions.**

| Number | Normalized Score | Number of Pairs | Positive Pairs | Negative Pairs | Zero Pairs | Assignments                                                   |
|--------|------------------|-----------------|----------------|----------------|------------|---------------------------------------------------------------|
| 1      | 3.09             | 3               | 2              | 1              | 0          | 2.7.2.11 : YDR300C<br>1.2.1.41 : YOR323C<br>1.5.1.2 : YER023W |

Table 43: **Assignments for the pathway "proline biosynthesis I" (rosetta data set). There are 1 possible assignments of genes to reactions.**

| Number | Normalized Score | Number of Pairs | Positive Pairs | Negative Pairs | Zero Pairs | Assignments                                               |
|--------|------------------|-----------------|----------------|----------------|------------|-----------------------------------------------------------|
| 1      | 37.35            | 1               | 1              | 0              | 2          | 1.8.1.2 : 1944<br>2.7.1.25 : YKL001C<br>2.7.7.4 : YJR010W |

Table 44: **Assignments for the pathway "sulfate assimilation 2" (rosetta data set). There are 1 possible assignments of genes to reactions.**

| Number | Normalized Score | Number of Pairs | Positive Pairs | Negative Pairs | Zero Pairs | Assignments                              |
|--------|------------------|-----------------|----------------|----------------|------------|------------------------------------------|
| 1      | -1.64            | 1               | 0              | 1              | 0          | 2.6.1.16 : YKL104C<br>2.7.7.23 : YDL103C |

Table 45: Assignments for the pathway "UDP-N-acetylglucosamine biosynthesis" (rosetta data set). There are 1 possible assignments of genes to reactions.

| Number | Normalized Score | Number of Pairs | Positive Pairs | Negative Pairs | Zero Pairs | Assignments                                                 |
|--------|------------------|-----------------|----------------|----------------|------------|-------------------------------------------------------------|
| 1      | 35.31            | 3               | 3              | 0              | 0          | 2.1.3.3 : YJL088W<br>4.3.2.1 : YHR018C<br>6.3.4.5 : YOL058W |

Table 46: Assignments for the pathway "arginine biosynthesis I" (rosetta data set). There are 1 possible assignments of genes to reactions.

| Number | Normalized Score | Number of Pairs | Positive Pairs | Negative Pairs | Zero Pairs | Assignments                                                                                                                                                                    |
|--------|------------------|-----------------|----------------|----------------|------------|--------------------------------------------------------------------------------------------------------------------------------------------------------------------------------|
| 1      | 24.88            | 12              | 12             | 0              | 24         | 2.4.2.17 : YER055C<br>3.5.4.19 : 601<br>3.6.1.31 : 601<br>5.3.1.16 : YIL020C<br>4.2.1.19 : YOR202W<br>2.6.1.9 : YIL116W<br>3.1.3.15 : 1939<br>1.1.1.23 : 601<br>1.1.1.23 : 601 |

Table 47: Assignments for the pathway "histidine biosynthesis I" (rosetta data set). There are 1 possible assignments of genes to reactions.

| Number | Normalized Score | Number of Pairs | Positive Pairs | Negative Pairs | Zero Pairs | Assignments                                                   |
|--------|------------------|-----------------|----------------|----------------|------------|---------------------------------------------------------------|
| 1      | 13.90            | 3               | 3              | 0              | 0          | 2.6.1.13 : YLR438W<br>1.5.1.12 : YHR037W<br>3.5.3.1 : YPL111W |

Table 48: Assignments for the pathway "arginine degradation I" (rosetta data set). There are 1 possible assignments of genes to reactions.

| Number | Normalized Score | Number of Pairs | Positive Pairs | Negative Pairs | Zero Pairs | Assignments                                                  |
|--------|------------------|-----------------|----------------|----------------|------------|--------------------------------------------------------------|
| 1      | 6.68             | 3               | 1              | 2              | 0          | 1.1.1.3 : YJR139C<br>1.2.1.11 : YDR158W<br>2.7.2.4 : YER052C |

Table 49: **Assignments for the pathway "homoserine biosynthesis" (rosetta data set). There are 1 possible assignments of genes to reactions.**

| Number | Normalized Score | Number of Pairs | Positive Pairs | Negative Pairs | Zero Pairs | Assignments                                                  |
|--------|------------------|-----------------|----------------|----------------|------------|--------------------------------------------------------------|
| 1      | 13.43            | 3               | 3              | 0              | 0          | 3.5.3.1 : YPL111W<br>2.6.1.13 : YLR438W<br>1.5.1.2 : YER023W |

Table 50: **Assignments for the pathway "arginine proline degradation" (rosetta data set). There are 1 possible assignments of genes to reactions.**

| Number | Normalized Score | Number of Pairs | Positive Pairs | Negative Pairs | Zero Pairs | Assignments                            |
|--------|------------------|-----------------|----------------|----------------|------------|----------------------------------------|
| 1      | 1.98             | 1               | 1              | 0              | 0          | 6.3.2.3 : YOL049W<br>6.3.2.2 : YJL101C |

Table 51: **Assignments for the pathway "glutathione biosynthesis" (rosetta data set). There are 1 possible assignments of genes to reactions.**

| Number | Normalized Score | Number of Pairs | Positive Pairs | Negative Pairs | Zero Pairs | Assignments                               |
|--------|------------------|-----------------|----------------|----------------|------------|-------------------------------------------|
| 1      | 2.86             | 1               | 1              | 0              | 0          | 1.13.11.11 : YJR078W<br>3.5.1.9 : YJL060W |

Table 52: **Assignments for the pathway "tryptophan kynurenine degradation" (rosetta data set). There are 1 possible assignments of genes to reactions.**
