# Supplementary material for: Automation of gene assignments to metabolic pathways using high-throughput expression data
Source: Springer Nature journal article supplement (doi:10.1186/1471-2105-6-217), 2005-08-31

**a**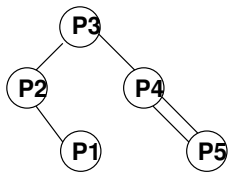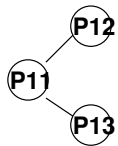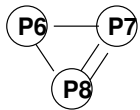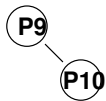**b**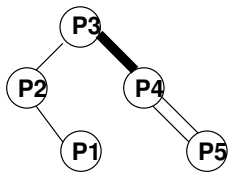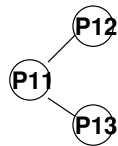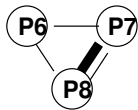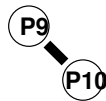**c**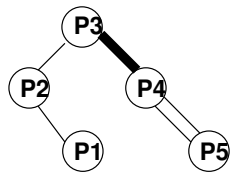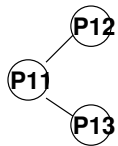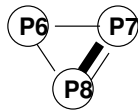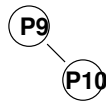

Supplement: 12859_2005_542_MOESM3_ESM.pdf [file 12859_2005_542_MOESM3_ESM.pdf]
